# Supplementary material for: Disparities in particulate matter (PM 10 ) origins and oxidative potential at a city scale (Grenoble, France) – Part 1: Source apportionment at three neighbouring sites
Source: Copernicus journal article supplement (doi:10.5194/acp-21-5415-2021), 2021-04-08
Supplement: Supplementary file 1 [file acp-21-5415-2021-supplement.pdf]

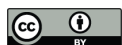

*Supplement of*

**Disparities in particulate matter (PM<sub>10</sub>) origins and oxidative potential at a city scale (Grenoble, France) – Part 1: Source apportionment at three neighbouring sites**

**Lucille Joanna S. Borlaza et al.**

*Correspondence to:* Lucille Joanna Borlaza (lucille-joanna.borlaza@univ-grenoble-alpes.fr) and Jean-Luc Jaffrezo (jean-luc.jaffrezo@univ-grenoble-alpes.fr)

The copyright of individual parts of the supplement might differ from the article licence.

1  
2  
3  
4  
5

## Supplementary information

### Table of Contents

|                                                                                                     |    |
|-----------------------------------------------------------------------------------------------------|----|
| S1. Positive Matrix Factorization (PMF) analyses.....                                               | 2  |
| S2. PM <sub>10</sub> chemical characterization .....                                                | 3  |
| S3. Error estimations, chemical profiles, and temporal evolutions of the PMF-resolved sources ..... | 5  |
| Bootstrap mapping.....                                                                              | 7  |
| Biomass burning .....                                                                               | 8  |
| Primary traffic.....                                                                                | 10 |
| Aged sea salt.....                                                                                  | 12 |
| Sea/road salt.....                                                                                  | 14 |
| Nitrate-rich.....                                                                                   | 16 |
| Sulfate-rich .....                                                                                  | 19 |
| Primary biogenic.....                                                                               | 21 |
| MSA-rich .....                                                                                      | 23 |
| Secondary biogenic oxidation .....                                                                  | 25 |
| Industrial.....                                                                                     | 26 |
| Mineral dust.....                                                                                   | 28 |
| S4. Comparison between the PMF results from Srivastava et al. (2018b) and our study .....           | 30 |
| S5. Comparison of relative mass by site .....                                                       | 32 |
| S6. Comparison of chemical profiles from this study and from the 15 French sites (SOURCES).....     | 34 |

6 **S1. Positive Matrix Factorization (PMF) analyses**

7 PMF is based on a weighted least-squares fit algorithm following Eq. S1.

8

9

$$[\text{Eq. S1}]: X = (G \times F) + E$$

10

11 where: X is an (n × m) matrix representing the species concentration (m) for each samples (n),  
 12 G is the (n × p) matrix representing the source contribution, F is the (p × m) matrix representing  
 13 the factor composition and E is the residuals matrix (i.e., difference between measurements and  
 14 model output). A condition of non-negativity for G and F matrix is imposed by the algorithm  
 15 and PMF find solutions by minimizing the sum of the squared residuals weighted by their  
 16 respective uncertainties.

17

18 In order to avoid double counting, OC\* was calculated using Eq. S2.

19

$$[\text{Eq. S2}]: \text{OC}^* = \text{OC} - (\text{MSA} \times 0.12) + (\text{polyols} \times 0.40) + (\text{levoglucosan} \times 0.44) +$$

$$(\text{mannosan} \times 0.44)$$

22

23 The uncertainties of the input variables were calculated using Eq. S3 based on Gianini et al.  
 24 (2012).

25

26

$$[\text{Eq. S3}]: \sigma_{mn} = \sqrt{(\text{DL}_m)^2 + (\text{CV}_m \times x_{mn})^2 + (a_m \times x_{mn})^2}$$

27

28 where: DL represents the species detection limit,  $x_{mn}$  represents concentration of species m on  
 29 sample n, CV represents the coefficient of variation of specie m, and  $a_m$  represents an additional  
 30 coefficient of variation. The calculated uncertainty of 5/6×DL was used for concentrations  
 31 <DL, and the calculated uncertainty of 4 times the geometric mean was used for missing values  
 32 (Polissar et al., 1998). Finally, the species chosen as input variables in the PMF matrix were  
 33 evaluated based on their signal-to-noise ratio (S/N). Species with S/N>0.2 were considered as  
 34 “strong”,  $2.0 \geq S/N \geq 0.2$  were considered as “weak”, and S/N<0.2 were considered as “bad”.

35

36 **Table S1: Summary of input variables and uncertainties in the PMF analyses.**

|               | Carbonaceous           | Water-soluble ions                                                                                                                                                              | Organic tracers                                                                          | Metals                                                                      |
|---------------|------------------------|---------------------------------------------------------------------------------------------------------------------------------------------------------------------------------|------------------------------------------------------------------------------------------|-----------------------------------------------------------------------------|
| Species       | OC*, EC                | MSA, Cl <sup>-</sup> , NO <sub>3</sub> <sup>-</sup> ,<br>SO <sub>4</sub> <sup>2-</sup> , NH <sub>4</sub> <sup>+</sup> , K <sup>+</sup> ,<br>Mg <sup>2+</sup> , Ca <sup>2+</sup> | Polyols, levoglucosan,<br>mannosan, cellulose, 3-<br>MBTCA, phthalic acid,<br>pinic acid | Al, As, Cd, Cr, Cu, Fe, Mn,<br>Mo, Ni, Pb, Rb, Sb, Se, Sn,<br>Sr, Ti, V, Zn |
| Uncertainties | Gianini, et al. (2012) |                                                                                                                                                                                 |                                                                                          |                                                                             |
| factor “a”    | 0.03                   | 0.05                                                                                                                                                                            | 0.10                                                                                     | 0.15                                                                        |

37

38 To resolve the mixing issues, the PMF equation was solved using the ME-2 solver (Paatero,  
 39 1999; Paatero and Hopke, 2002) allowing the addition of constraints and expressions to the  
 40 solved the PMF solution.

41

42 The criteria for a valid solution were the recommendations of the Joint Research Community  
 43 (JRC) report based on Belis et al. (2014).

44

45

46

47

48

- the Q/Q<sub>exp</sub> ratio (<1.5)
- the weighted residuals are normal and between ±4
- the chemical interpretation of the obtained factors
- the information based on the error estimation by bootstrap and displacement method

- 49 • the total reconstructed PM<sub>10</sub> mass from the PMF-resolved factors

50  
51 The solutions presented in this study are the optimal solutions from the constrained runs in each  
52 site.

53  
54 The Pearson distance and the Similarity Identity Distance (PD-SID):

55  
56 In order to evaluate the homogeneity of the chemical profiles in each urban site, the similarity  
57 between the factors were assessed by calculating the Pearson distance (PD) and the Similarity  
58 Identity Distance (SID), following Belis et al. (2015). The PD and SID defined by Eq. S4 and  
59 Eq. S5:

60  
61 [Eq. S4]:  $PD = 1 - r^2$ , where r is the Pearson coefficient

62  
63 [Eq. S5]:  $\frac{\sqrt{2}}{n} \sum_{i=1}^n \frac{|a_i - b_i|}{a_i + b_i}$

64 where a and b are the relative mass to PM<sub>10</sub> of two different factors and n is the number of  
65 common specie in a and b. In brief, the PD-SID metric aims to compare profiles based on their  
66 relative mass composition. The PD provides information on the sensitivity of a profile to  
67 variations in the major mass fractions of PM, while the SID provides information on the  
68 sensitivity to all components. PD<0.4 and SID<1 are considered as acceptable criteria for  
69 profile similarity, according to Pernigotti and Belis (2018).

70  
71

## 72 S2. PM<sub>10</sub> chemical characterization

73 Table S2. Annual average of PM<sub>10</sub> mass concentrations and chemical compositions (in µg m<sup>-3</sup>) at all sites, and individual urban  
74 sites in the Grenoble basin.  
75

| Species      | Unit              | Mean [Q1, Q3]     |                                |                             |                     |
|--------------|-------------------|-------------------|--------------------------------|-----------------------------|---------------------|
|              |                   | All sites         | CB<br>(urban hyper-<br>center) | LF<br>(urban<br>background) | Vif<br>(peri-urban) |
| PM10recons   | µg/m <sup>3</sup> | 14.4 [8.0, 17.8]  | 16.0 [8.8, 20.3]               | 14.2 [8.1, 17.2]            | 13.1 [7.3, 16.5]    |
| OC*          |                   | 3.95 [2.28, 5.0]  | 4.14 [2.43, 5.28]              | 3.95 [2.28, 4.73]           | 3.75 [2.12, 4.49]   |
| EC           |                   | 1.01 [0.46, 1.32] | 1.18 [0.57, 1.5]               | 1.12 [0.53, 1.35]           | 0.73 [0.34, 0.85]   |
| Cl-          |                   | 0.12 [0.01, 0.1]  | 0.16 [0.02, 0.15]              | 0.08 [0.01, 0.08]           | 0.1 [0.0, 0.08]     |
| NO3-         |                   | 2.02 [0.48, 2.11] | 2.55 [0.67, 3.16]              | 1.78 [0.51, 1.7]            | 1.72 [0.36, 1.7]    |
| SO42-        |                   | 1.48 [0.81, 1.89] | 1.58 [0.89, 2.0]               | 1.53 [0.87, 1.97]           | 1.33 [0.69, 1.74]   |
| Na+          |                   | 0.17 [0.07, 0.2]  | 0.2 [0.08, 0.24]               | 0.15 [0.06, 0.19]           | 0.15 [0.06, 0.18]   |
| NH4+         |                   | 0.85 [0.3, 0.89]  | 0.99 [0.31, 1.11]              | 0.81 [0.32, 0.81]           | 0.75 [0.27, 0.79]   |
| K+           |                   | 0.15 [0.07, 0.18] | 0.16 [0.08, 0.19]              | 0.15 [0.07, 0.17]           | 0.13 [0.06, 0.17]   |
| Mg2+         |                   | 0.02 [0.01, 0.02] | 0.02 [0.01, 0.03]              | 0.02 [0.01, 0.02]           | 0.02 [0.01, 0.02]   |
| Ca2+         |                   | 0.32 [0.13, 0.44] | 0.36 [0.13, 0.52]              | 0.31 [0.12, 0.38]           | 0.3 [0.13, 0.42]    |
| MSA          |                   | 0.02 [0.01, 0.03] | 0.03 [0.01, 0.03]              | 0.02 [0.01, 0.03]           | 0.02 [0.01, 0.03]   |
| Levoglucosan |                   | 0.3 [0.02, 0.42]  | 0.25 [0.02, 0.35]              | 0.28 [0.02, 0.42]           | 0.36 [0.02, 0.47]   |
| Mannosan     |                   | 0.03 [0.0, 0.04]  | 0.03 [0.0, 0.04]               | 0.03 [0.0, 0.05]            | 0.04 [0.0, 0.05]    |
| Polyols      |                   | 0.04 [0.01, 0.06] | 0.04 [0.01, 0.06]              | 0.04 [0.01, 0.06]           | 0.05 [0.01, 0.07]   |
| Cellulose    |                   | 0.08 [0.02, 0.12] | 0.13 [0.07, 0.17]              | 0.05 [0.02, 0.08]           | 0.06 [0.01, 0.09]   |

|               |                   |                        |                         |                         |                      |
|---------------|-------------------|------------------------|-------------------------|-------------------------|----------------------|
| 3-MBTCA       | ng/m <sup>3</sup> | 9.13 [1.75, 12.92]     | 9.8 [1.83, 13.18]       | 8.5 [1.72, 11.89]       | 9.09 [1.69, 13.18]   |
| Phthalic_acid |                   | 3.54 [1.8, 4.02]       | 3.5 [1.82, 4.13]        | 3.88 [1.88, 4.68]       | 3.24 [1.78, 3.82]    |
| Pinic_acid    |                   | 6.61 [2.3, 7.83]       | 5.36 [1.65, 7.21]       | 5.25 [2.48, 6.66]       | 9.22 [2.94, 11.28]   |
| Al            |                   | 62.67 [19.6, 68.7]     | 62.26 [22.41, 73.59]    | 65.58 [21.95, 68.43]    | 60.19 [16.82, 63.54] |
| As            |                   | 0.33 [0.14, 0.39]      | 0.41 [0.16, 0.47]       | 0.37 [0.17, 0.48]       | 0.23 [0.11, 0.27]    |
| Cd            |                   | 0.07 [0.02, 0.09]      | 0.08 [0.02, 0.1]        | 0.07 [0.02, 0.09]       | 0.05 [0.01, 0.06]    |
| Cr            |                   | 1.65 [0.61, 1.73]      | 2.27 [0.79, 2.23]       | 1.61 [0.7, 1.79]        | 1.05 [0.61, 1.01]    |
| Cu            |                   | 8.5 [3.82, 9.8]        | 11.59 [5.17, 13.27]     | 8.79 [4.08, 10.24]      | 5.09 [2.72, 6.18]    |
| Fe            |                   | 215.26 [91.41, 270.23] | 241.66 [104.95, 290.45] | 248.53 [112.83, 299.27] | 155.64 [68.3, 184.7] |
| Mn            |                   | 9.0 [2.73, 9.36]       | 11.73 [3.38, 11.77]     | 7.19 [2.63, 8.31]       | 8.03 [2.21, 7.09]    |
| Mo            |                   | 0.59 [0.19, 0.65]      | 0.8 [0.25, 0.92]        | 0.63 [0.21, 0.67]       | 0.35 [0.13, 0.41]    |
| Ni            |                   | 0.91 [0.37, 1.07]      | 1.18 [0.5, 1.4]         | 0.92 [0.39, 1.12]       | 0.63 [0.3, 0.75]     |
| Pb            |                   | 4.42 [1.52, 5.01]      | 5.73 [2.0, 7.23]        | 4.84 [1.72, 5.75]       | 2.69 [1.15, 3.06]    |
| Rb            |                   | 0.45 [0.21, 0.58]      | 0.48 [0.25, 0.6]        | 0.44 [0.21, 0.57]       | 0.41 [0.18, 0.58]    |
| Sb            |                   | 1.31 [0.33, 0.93]      | 1.71 [0.46, 1.33]       | 1.53 [0.4, 1.26]        | 0.69 [0.22, 0.51]    |
| Se            |                   | 0.39 [0.23, 0.5]       | 0.43 [0.27, 0.54]       | 0.41 [0.26, 0.53]       | 0.32 [0.18, 0.43]    |
| Sn            |                   | 2.26 [1.41, 2.63]      | 2.6 [1.55, 3.13]        | 2.45 [1.49, 2.96]       | 1.73 [1.28, 2.03]    |
| Ti            |                   | 3.81 [1.6, 4.95]       | 4.11 [1.8, 5.57]        | 3.83 [1.68, 5.08]       | 3.49 [1.38, 4.32]    |
| V             |                   | 0.48 [0.16, 0.62]      | 0.51 [0.19, 0.62]       | 0.52 [0.16, 0.65]       | 0.42 [0.13, 0.52]    |
| Zn            |                   | 20.27 [6.09, 21.82]    | 26.11 [8.18, 28.63]     | 23.58 [8.69, 24.41]     | 11.11 [3.64, 12.07]  |

76  
77

Table S3. The average of the field blanks of the campaign used to set the quantification limit (QL) of the species

| Specie | OC                | EC                | MSA               | Cl <sup>-</sup>   | NO <sub>3</sub> <sup>-</sup> | SO <sub>4</sub> <sup>2-</sup> | Na <sup>+</sup>   | NH <sub>4</sub> <sup>+</sup> | K <sup>+</sup>    | Mg <sup>2+</sup>  | Ca <sup>2+</sup>  |
|--------|-------------------|-------------------|-------------------|-------------------|------------------------------|-------------------------------|-------------------|------------------------------|-------------------|-------------------|-------------------|
| Unit   | μg/m <sup>3</sup> | μg/m <sup>3</sup> | ng/m <sup>3</sup> | ng/m <sup>3</sup> | ng/m <sup>3</sup>            | ng/m <sup>3</sup>             | ng/m <sup>3</sup> | ng/m <sup>3</sup>            | ng/m <sup>3</sup> | ng/m <sup>3</sup> | ng/m <sup>3</sup> |
| QL     | 0.06              | 0.01              | 0.06              | 9.29              | 17.16                        | 11.00                         | 16.54             | 23.34                        | 3.10              | 1.04              | 5.23              |

78

| Specie | Arabitol          | Mannitol          | Levogluconan      | Mannosan          | Cellulose         | 3-MBTCA           | Phthalic acid     | Pinic acid        |
|--------|-------------------|-------------------|-------------------|-------------------|-------------------|-------------------|-------------------|-------------------|
| Unit   | ng/m <sup>3</sup> |
| QL     | 0.74              | 0.74              | 0.59              | 0.74              | 10.00             | 0.20              | 0.03              | 0.08              |

79

80 Figure S1.1: Percentage composition of PM<sub>10</sub>

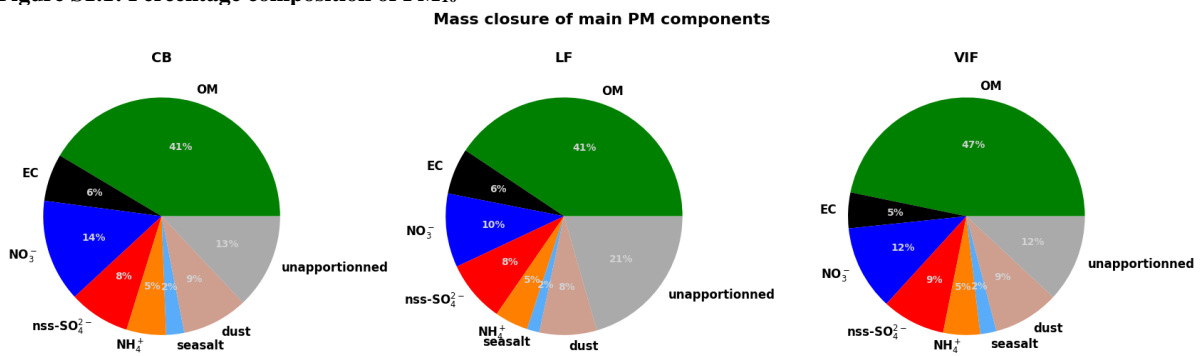

81

82 Figure S1.2: A scatterplot comparison of the PMF-reconstructed PM<sub>10</sub> and observed PM<sub>10</sub>

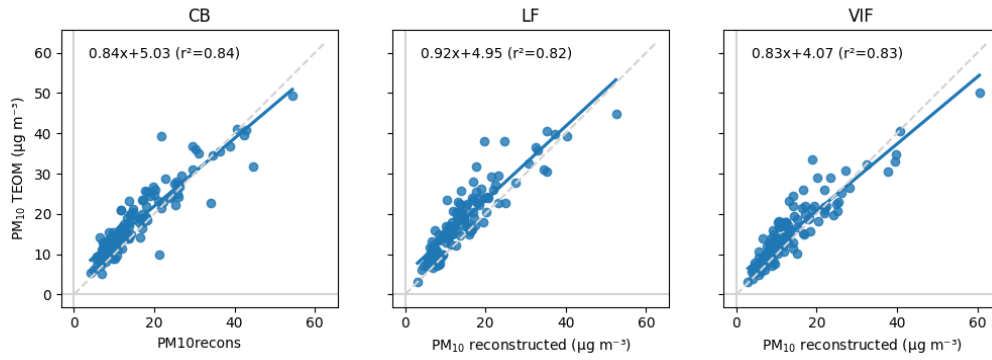

83

84

85 **S3. Error estimations, chemical profiles, and temporal evolutions of the PMF-resolved**  
 86 **sources**

87 **Figure S2.1 Species repartition among profiles in LF**

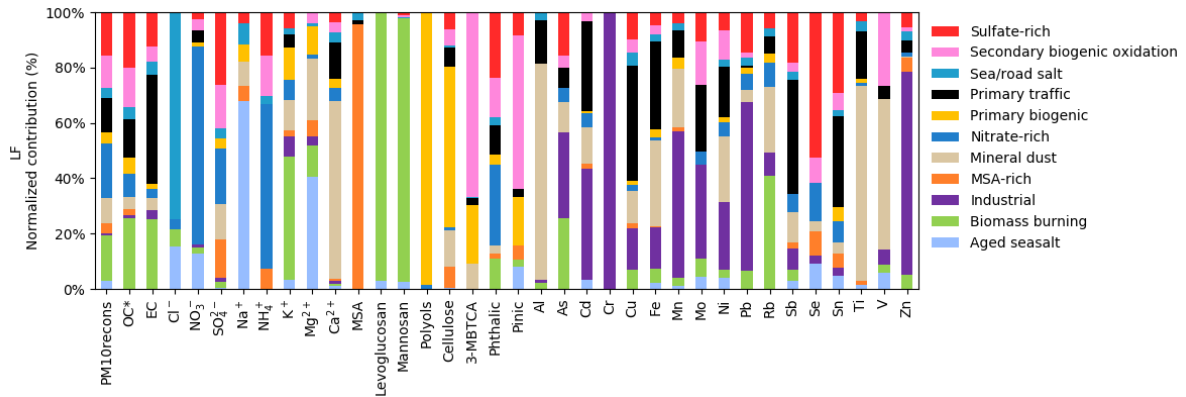

88

89 **Figure S2.2 Species repartition among profiles in CB**

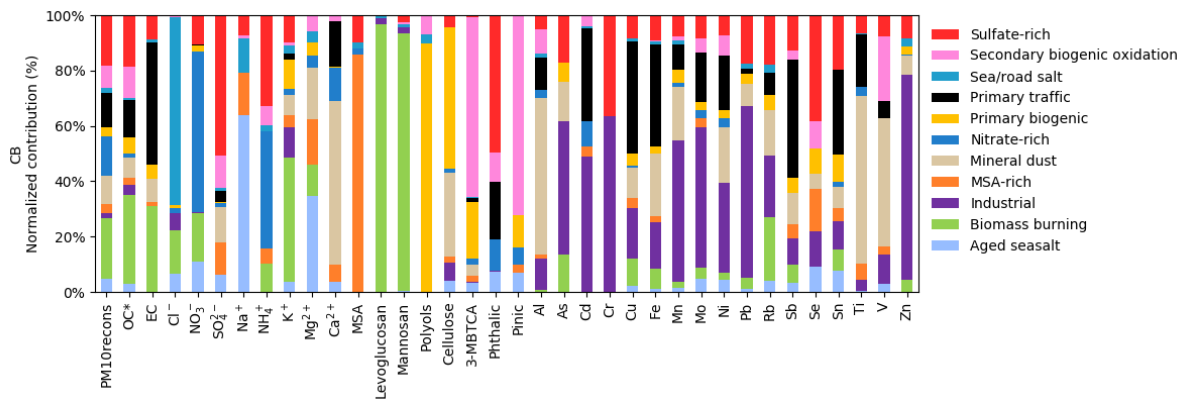

90

91 **Figure S2.3 Species repartition among profiles in Vif**

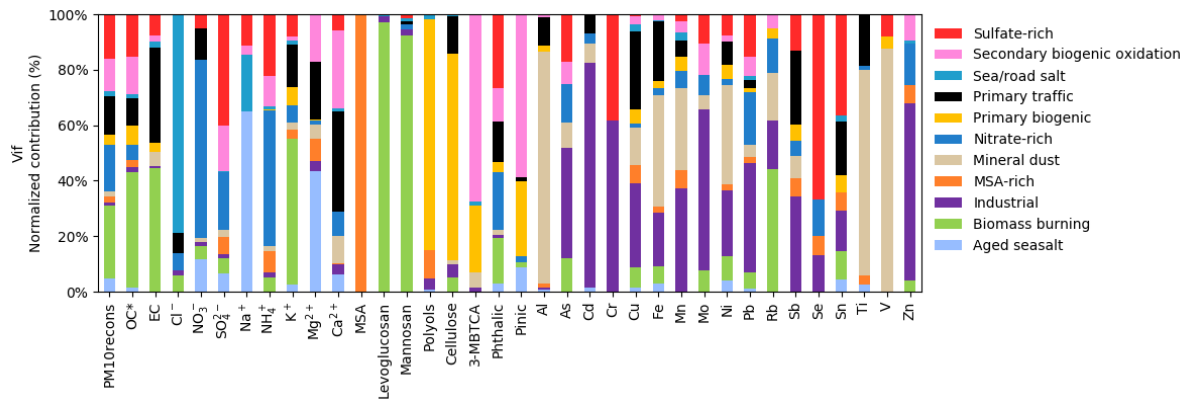

92

93

94

Figure S2.4 Seasonal contribution of the PMF-resolved sources to PM<sub>10</sub>

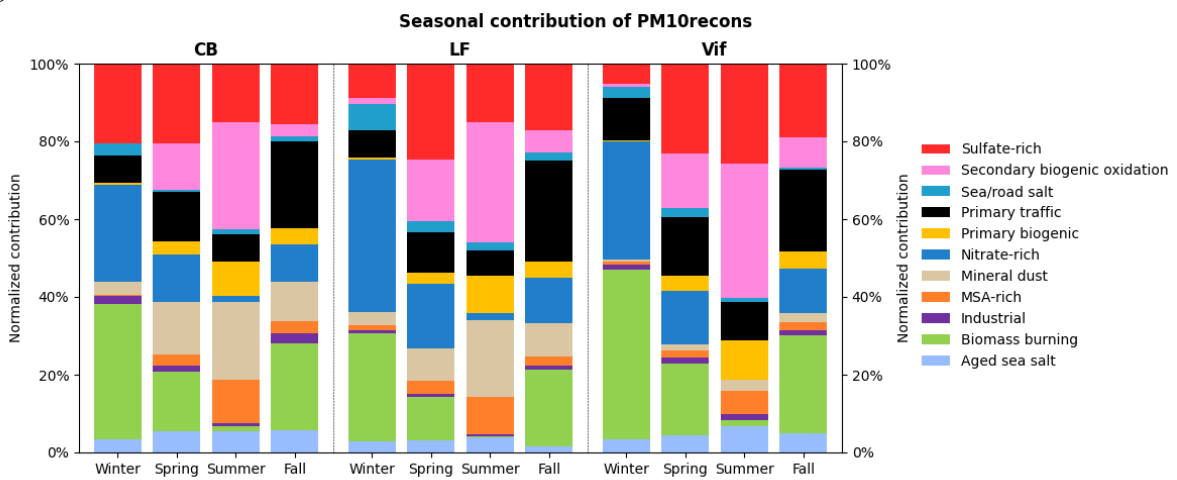

95

96

97

Figure S2.5 Seasonal contribution of the PMF-resolved sources to OC

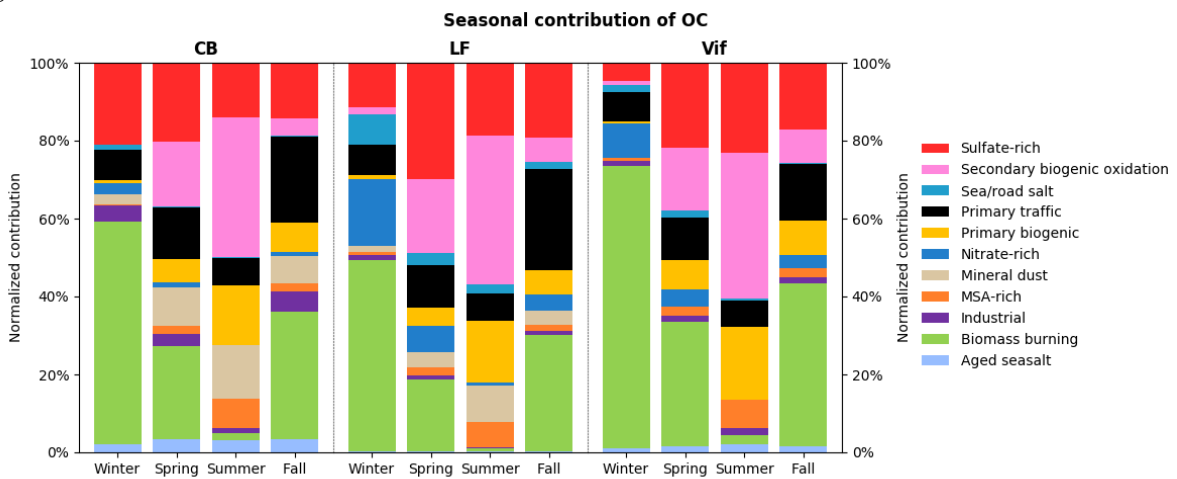

98

99

100

101

Figure S2.6 Seasonal contribution of the PMF-resolved sources to PM<sub>10</sub> during normal days ( $\leq 30 \mu\text{g m}^{-3}$ ) and polluted days ( $> 30 \mu\text{g m}^{-3}$ )

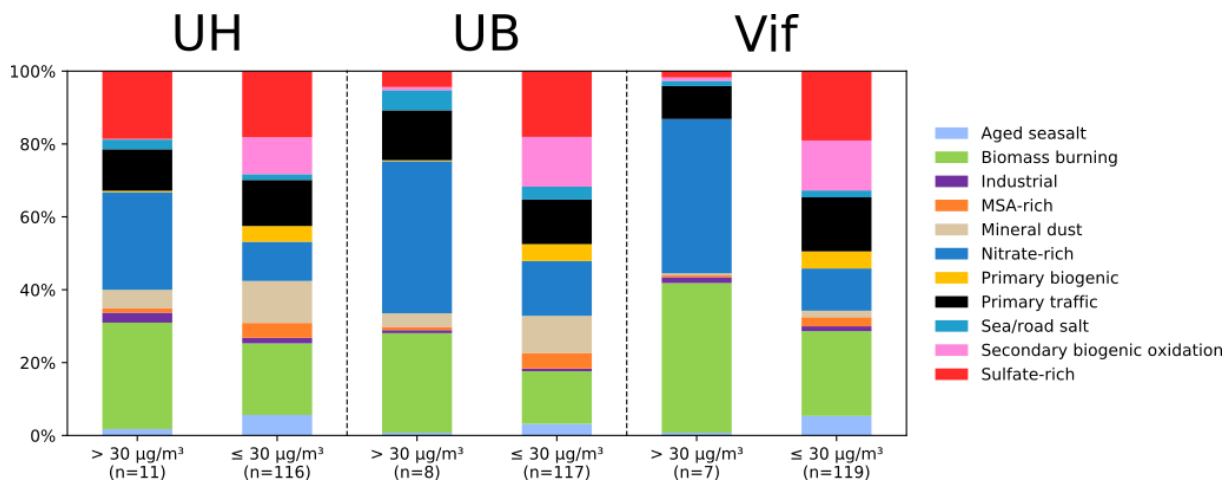

102

103

104

Figure S2.7 Comparison between PMF-reconstructed PM<sub>10</sub> and observed PM<sub>10</sub> from TEOM in µg m<sup>-3</sup>

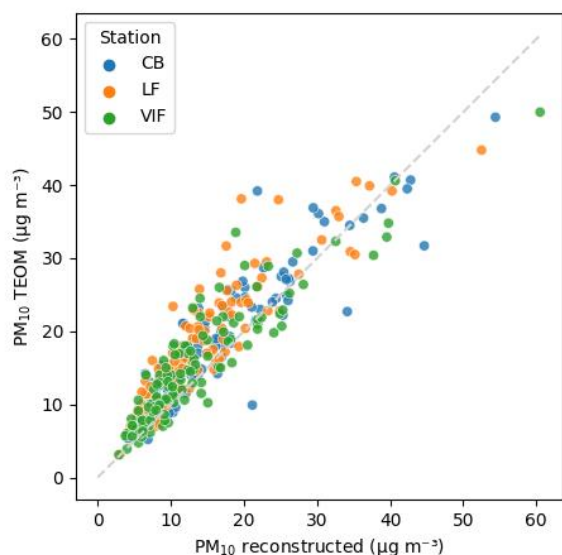

105

106

## 107 Bootstrap mapping

108

Table S4. Summary of the bootstrap (BS) mapping of the base and constrained run in the three urban sites.

| Factor                       | Baseline run |               | Constrained run |               |
|------------------------------|--------------|---------------|-----------------|---------------|
|                              | Range        | Mean unmapped | Range           | Mean unmapped |
| Industrial                   | 99-100       | 0             | 100             | 0             |
| Primary biogenic             | 99-100       | 0             | 100             | 0             |
| Biomass burning              | 100          | 0             | 100             | 0             |
| Mineral dust                 | 90-98        | 1.0           | 95-100          | 0             |
| Sulfate-rich                 | 75-98        | 1.3           | 88-99           | 0.7           |
| Secondary biogenic oxidation | 93-100       | 0.3           | 99-100          | 0             |
| MSA-rich                     | 92-96        | 0             | 100             | 0             |
| Nitrate-rich                 | 97-100       | 0.3           | 100             | 0             |
| Primary traffic              | 93-99        | 0             | 96-100          | 0             |
| Sea/road salt                | 79-99        | 0             | 97-100          | 0             |



109

110 **Biomass burning**

111

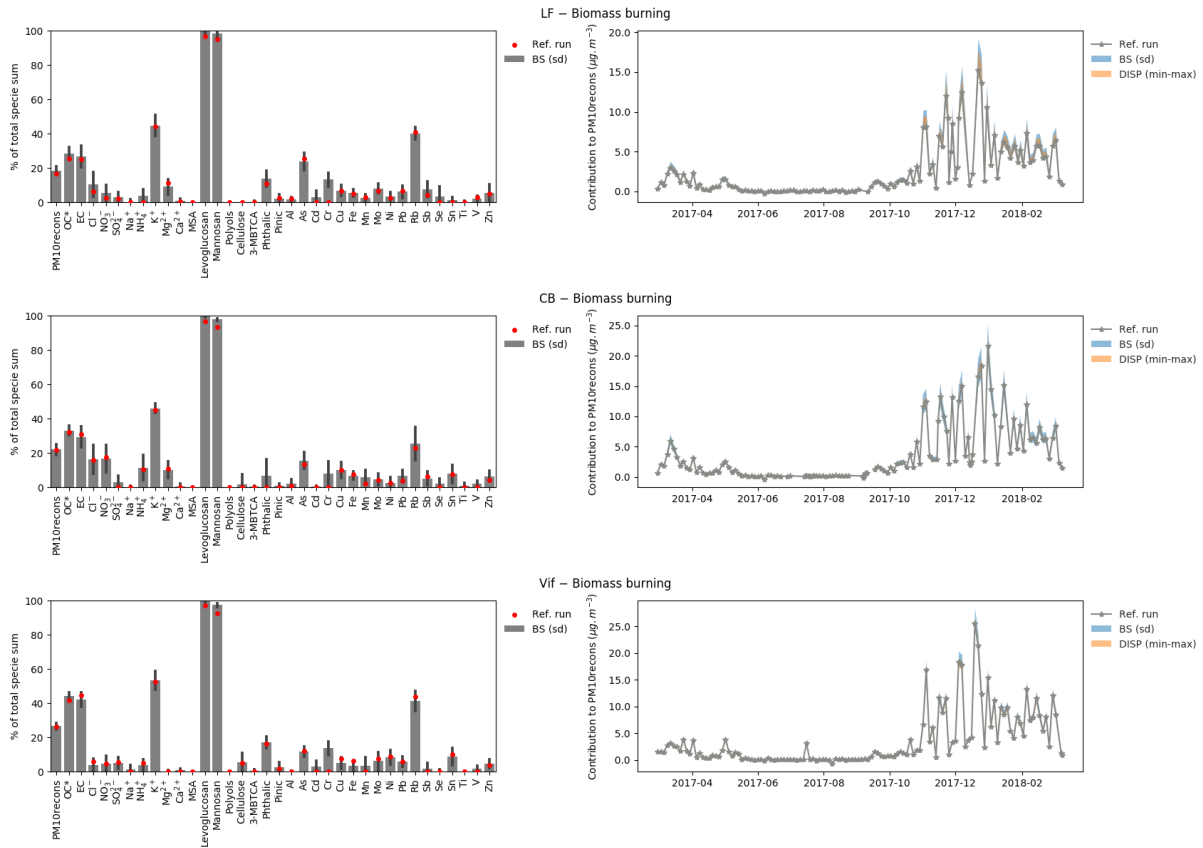

112

113

114

115

116

117

118

**Figure S3.1. Chemical profile and temporal evolution with error estimates of the biomass burning factor in LF (top), CB (middle), and Vif (bottom).**

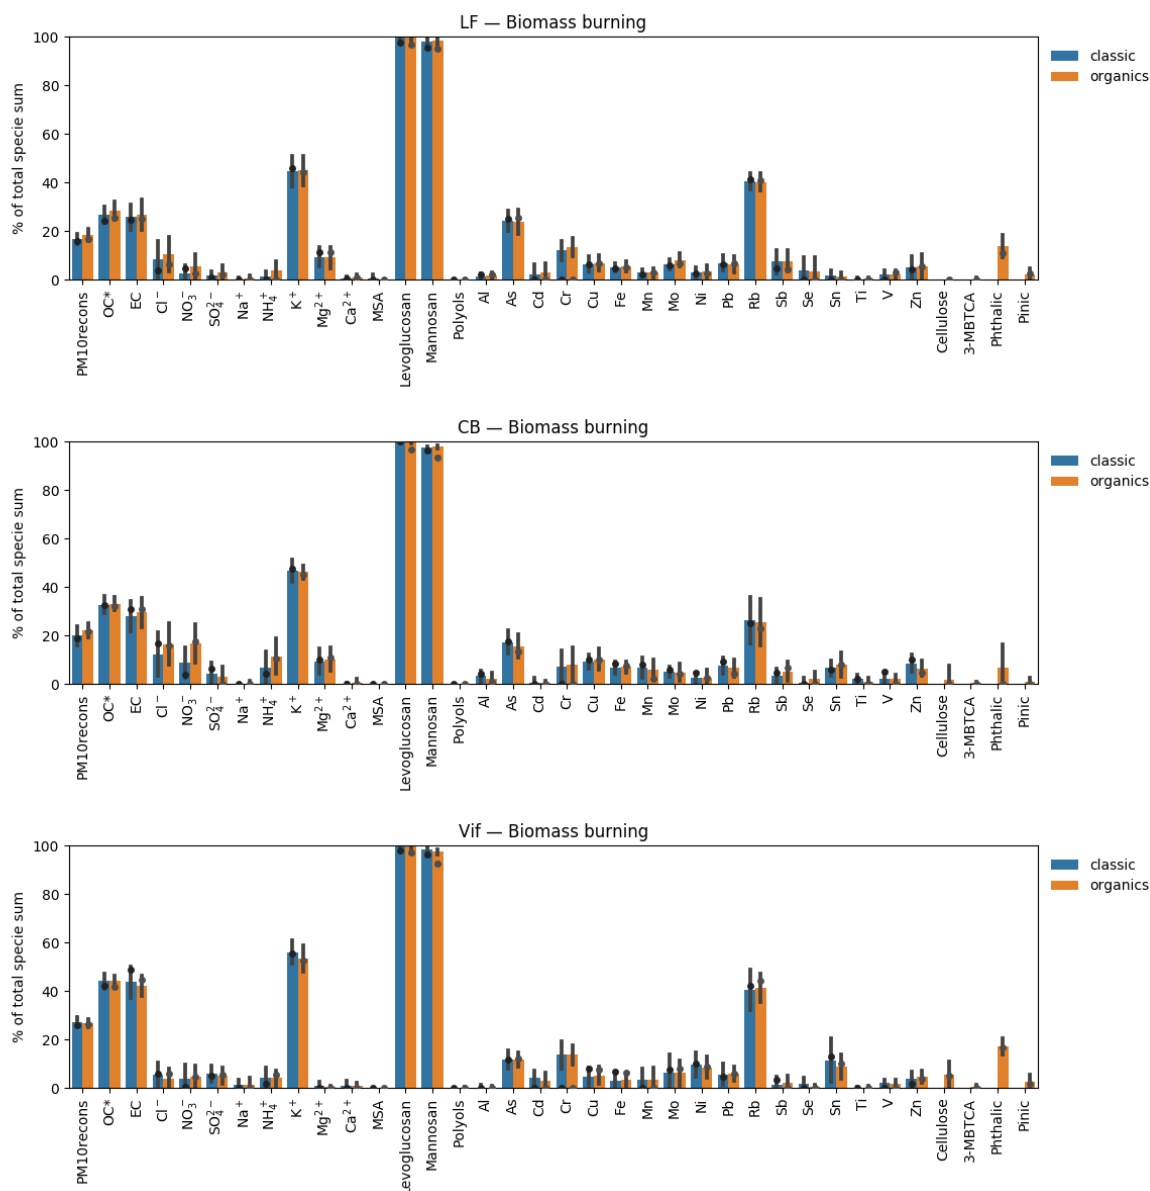

119

120

121

122 **Figure S3.1.1 Comparison of chemical profile between the classic and orga PMF run for the biomass burning factor in**  
 123 **LF (top), CB (middle), and Vif (bottom).**

124

125 The biomass burning factor was identified with high loadings of levoglucosan, mannosan, K<sup>+</sup>,  
 126 and Rb. On an annual scale, biomass burning accounted for 17% (2.3 μg m<sup>-3</sup>), 22% (3.5 μg m<sup>-3</sup>)  
 127 and 26% (3.4 μg m<sup>-3</sup>) of total PM<sub>10</sub> mass in LF, CB, and Vif, respectively. Strong correlations  
 128 were found across all sites indicating that the influence of this factor on PM<sub>10</sub> is on a larger  
 129 scale. This factor also showed strong seasonality with highest contributions during the winter  
 130 season, ranging according to site from 19-24% (2.2-2.5 μg m<sup>-3</sup>).

131 In CB, a notable contribution was also observed from NO<sub>3</sub><sup>-</sup> (17%) and NH<sub>4</sub><sup>+</sup> (10%) in this factor.  
 132 These species are commonly associated to secondary formation processes and direct emissions  
 133 from biomass burning (Tomaz et al., 2017). Aside from the usual tracers of biomass burning,  
 134 contributions from phthalic acid was also seen in the LF (11%) and Vif (16%) sites. Phthalic  
 135 acid is a known tracer of naphthalene-derived SOA (Al-Neima and Stone, 2017; Kleindienst et  
 136 al., 2012), thereby suggesting the influence of secondary aerosols in the biomass burning factor.

137 **Primary traffic**

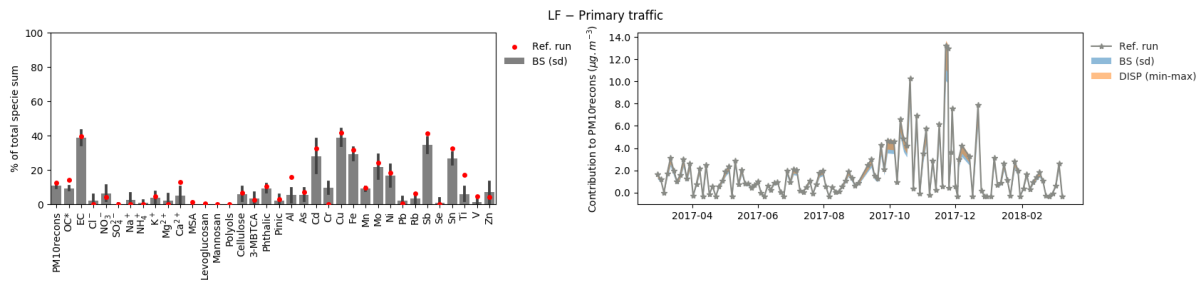

138

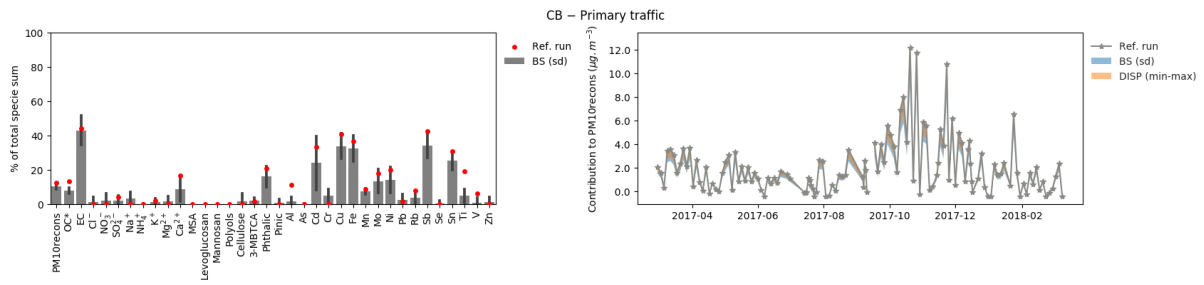

139

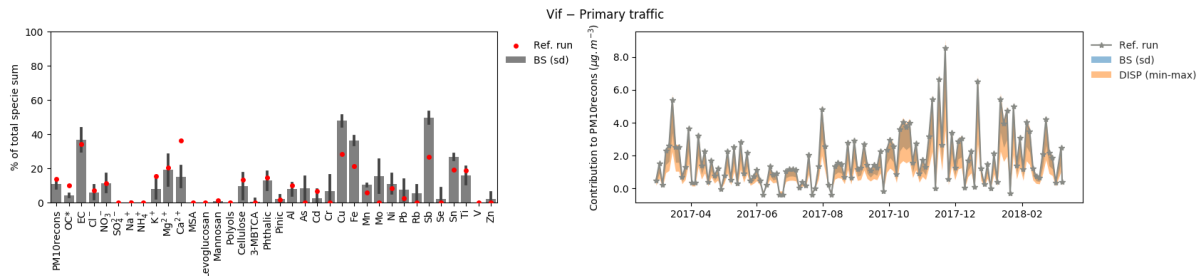

140

141

Figure S3.2. Chemical profile and temporal evolution with error estimates of the primary traffic factor in LF (top), CB (middle), and Vif (bottom).

142

143

144

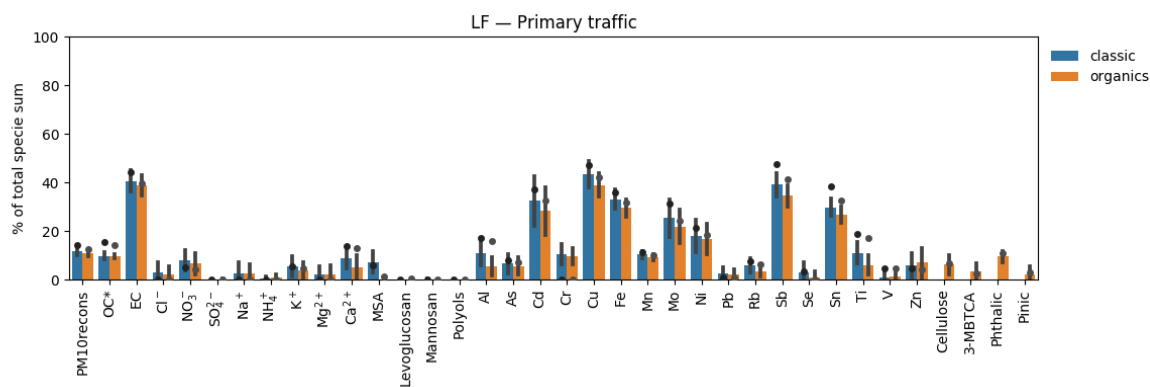

145

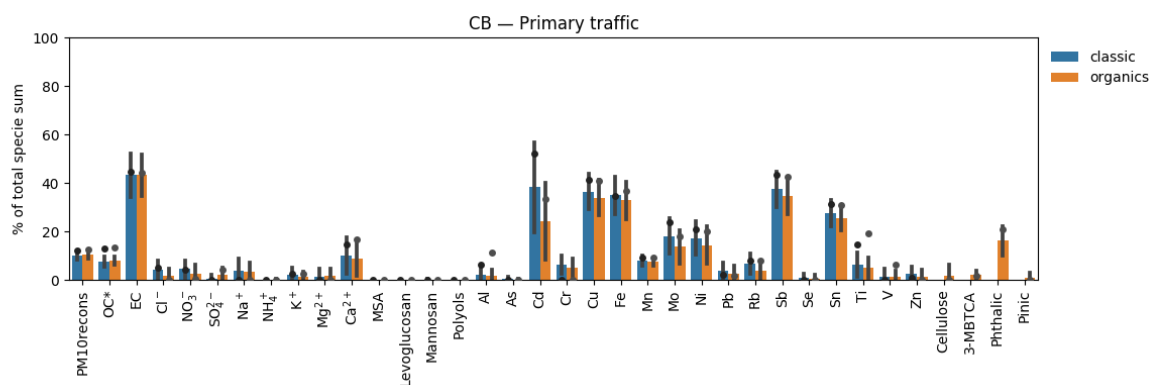

146

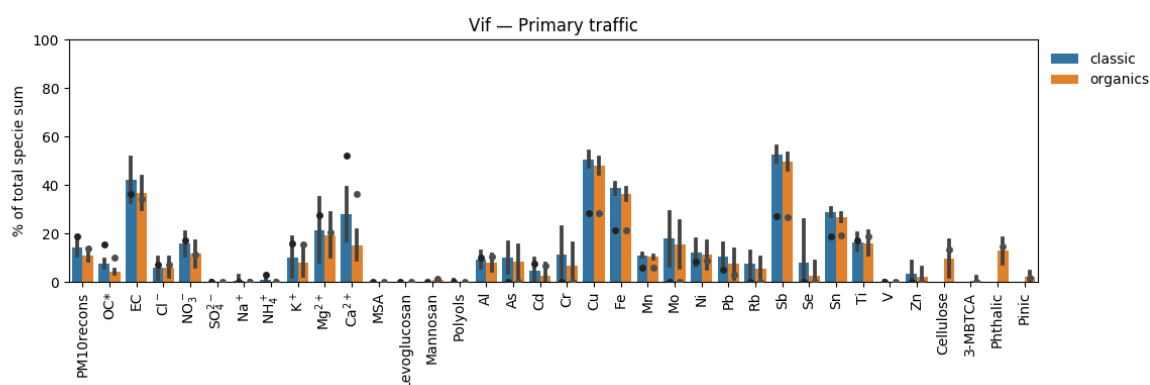

147

148 **Figure S3.2.1 Comparison of chemical profile between the classic and orga PMF run for the primary traffic factor in**  
 149 **LF (top), CB (middle), and Vif (bottom).**

150

151 The primary traffic factor was identified with high loadings of EC, Cu, Fe, Sn, and Sb. On an  
 152 annual scale, the primary traffic factor accounted for 11-14% in LF ( $1.8 \mu\text{g m}^{-3}$ ), CB ( $2.0 \mu\text{g m}^{-3}$ ), and Vif ( $1.8 \mu\text{g m}^{-3}$ ).  
 153

154 A typical tracer of traffic exhaust, EC, contributed 34-44% of its total mass to the primary traffic  
 155 factor. Contributions from metals in this factor can be attributed to road dust resuspension due  
 156 to road traffic activity such as wear and tear of tires, brake wear, and oil burning (Kulshrestha  
 157 et al., 2009; Pant and Harrison, 2013; Pant et al., 2017).

158 The primary traffic factor also showed minimal loadings from Cd in LF and CB sites, a tracer  
 159 known to originate from urban traffic soil (Liu et al., 2007, 2011). It is also interesting to note  
 160 that phthalic acid, one of the major components of automobile emissions (Kawamura and  
 161 Kaplan, 1987) and a known tracer of SOA formation (Al-Neima and Stone, 2017; Kleindienst  
 162 et al, 2012), has contributions to primary traffic factor ranging from 11% and 21% of its total  
 163 mass in LF and CB.

164 **Aged sea salt**

165

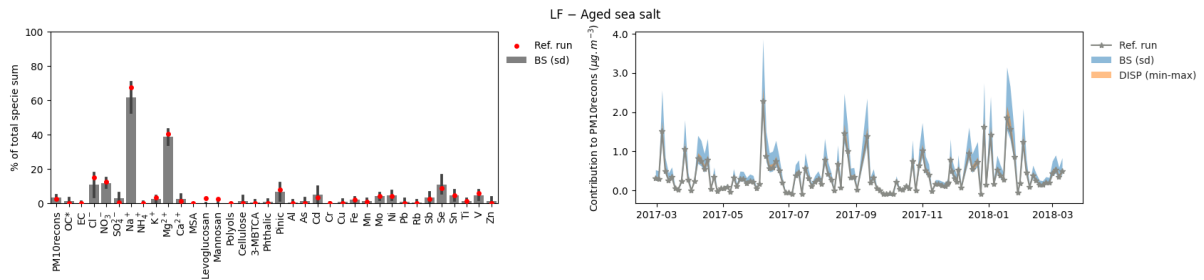

166

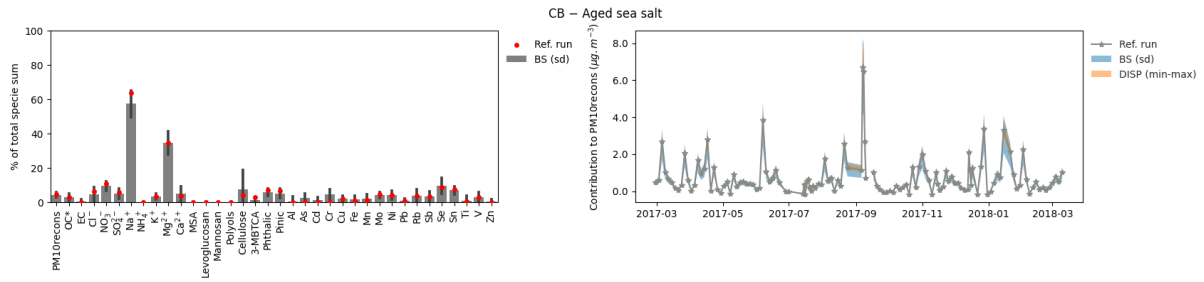

167

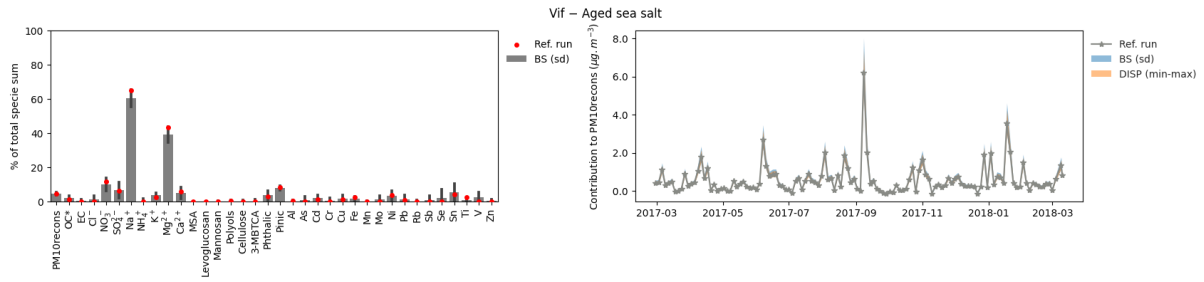

168

169 **Figure S3.3. Chemical profile and temporal evolution with error estimates of the sea salt factor in LF (top), CB (middle),**  
 170 **and Vif (bottom).**

171

172

173

174

175

176

177

178

179

180

181

182

183

184

185

186

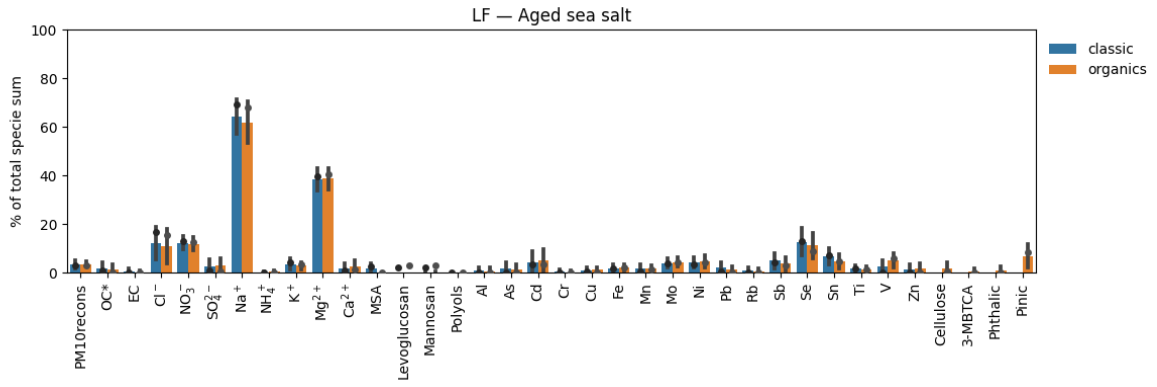

187

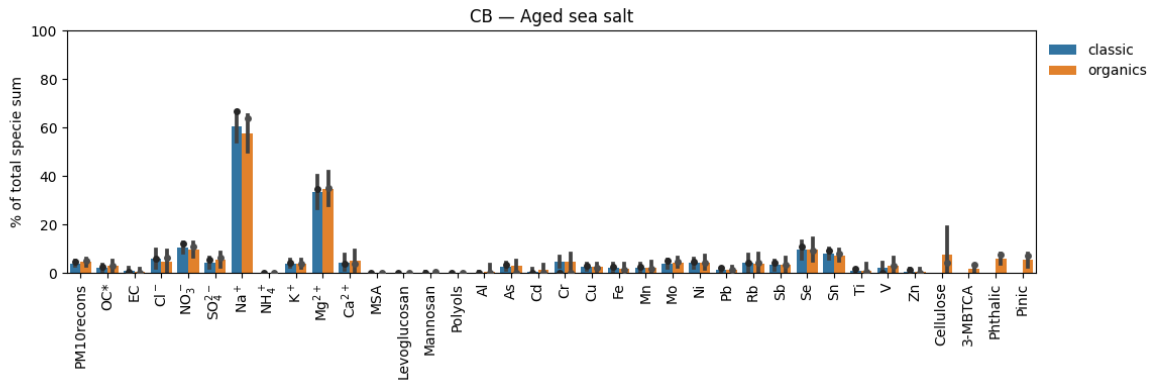

188

189

190

191

192

193

194

Figure S3.3.1 Comparison of chemical profile between the classic and orga PMF run for the aged sea salt factor in LF (top), CB (middle), and Vif (bottom).

See discussion of the Sea/road salt.

195 **Sea/road salt**

196

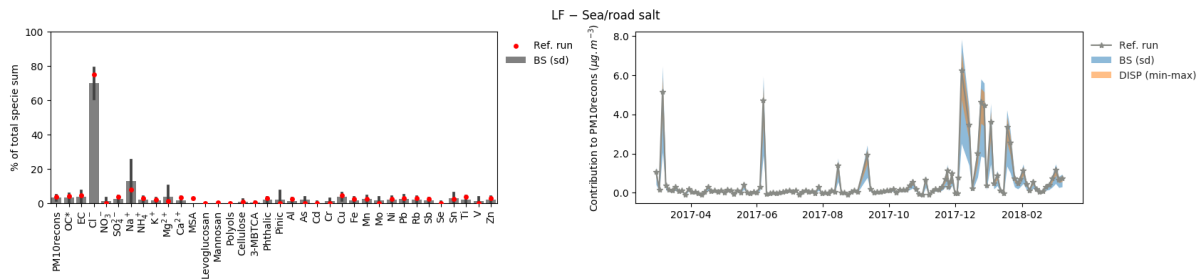

197

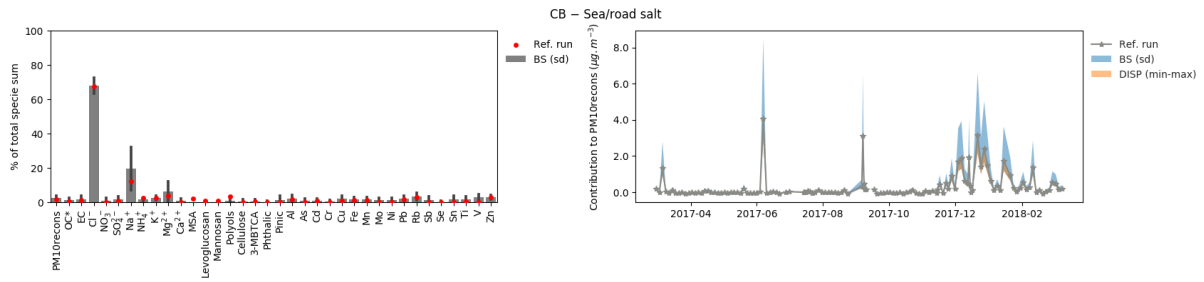

198

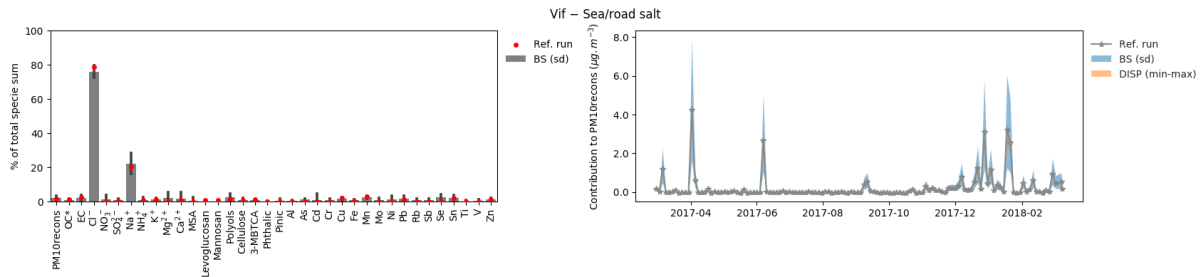

199

200

201

202

203

**Figure S3.4. Chemical profile and temporal evolution with error estimates of the sea/road salt factor in LF (top), CB (middle), and Vif (bottom).**

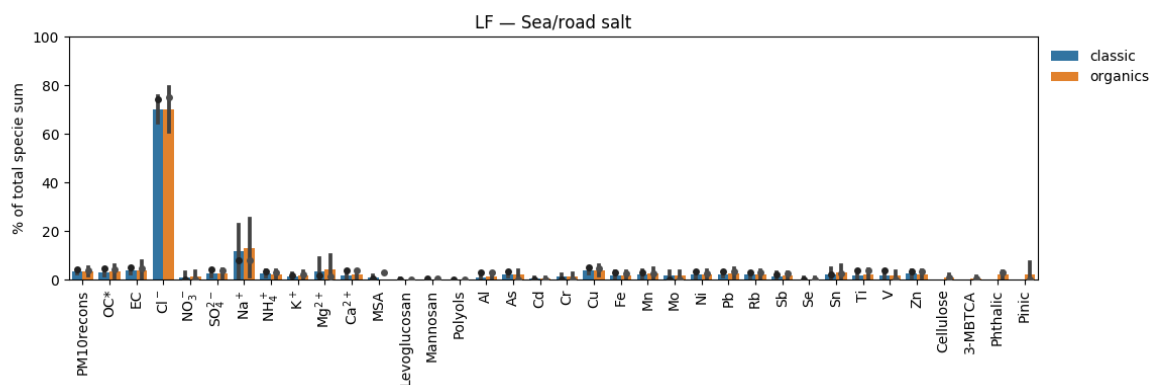

204

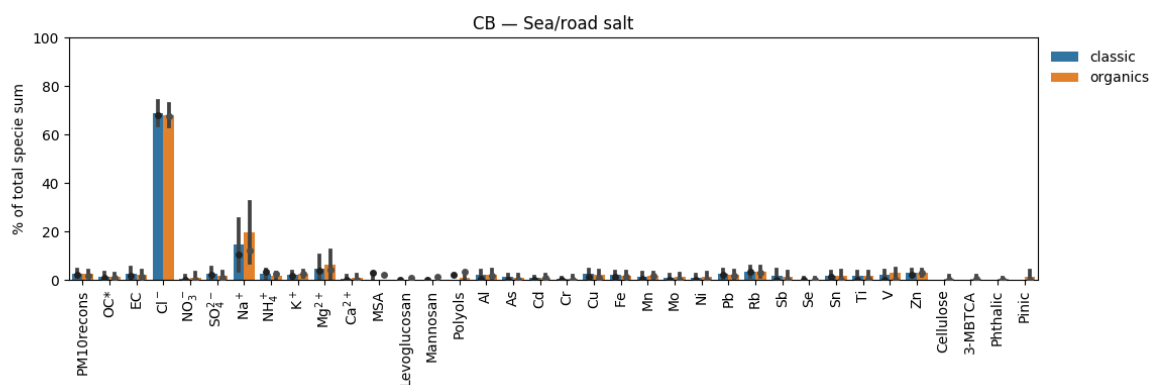

205

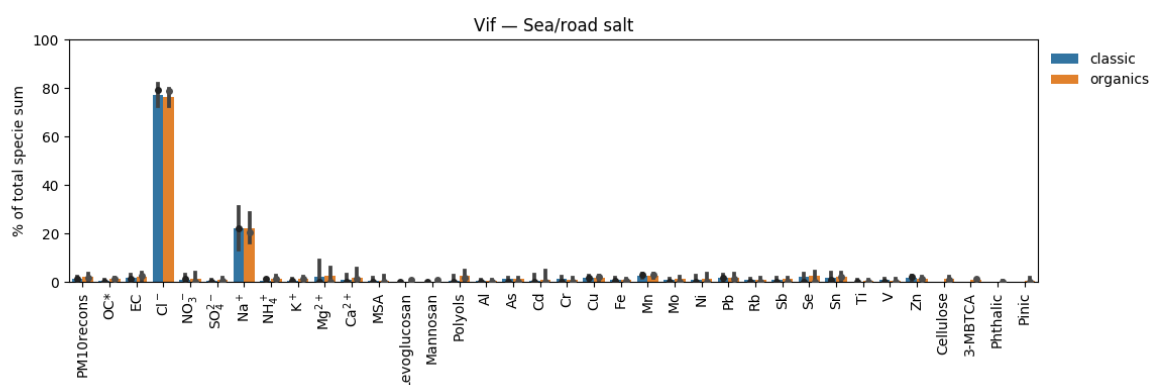

206

207

**Figure S3.4.1 Comparison of chemical profile between the classic and orga PMF run for the sea/road salt factor in LF (top), CB (middle), and Vif (bottom).**

208

209

210

211

212

213

214

215

216

217

218

219

220

221

The aged sea salt factor was identified with high loadings of  $\text{Na}^+$  and  $\text{Mg}^{2+}$ . The strong correlations of ions across all sites have been reflected in the strong correlations found between sea salt factors across all sites. On an annual scale, sea salt sources accounted for 3-5% of the total  $\text{PM}_{10}$  mass with a steady seasonal contribution. The observed minimal loadings of  $\text{Cl}^-$  in the aged sea salt factor resulted from an ageing process by heterogeneous reactions between particulate sea salt and acidic compounds (e.g., nitric and sulfuric acid) (Seinfeld and Pandis, 2012). On the other hand, the sea/road salt factor was identified with high loadings of  $\text{Na}^+$  and  $\text{Cl}^-$  accounting for 2-4% of the total mass of  $\text{PM}_{10}$ . This factor could be attributed to road salting during colder months as similarly reported by Pere´-Trepas et al. (2007) and Wåhlin et al. (2006) as contributions were also notably higher during winter season.

221



222 Nitrate-rich

223

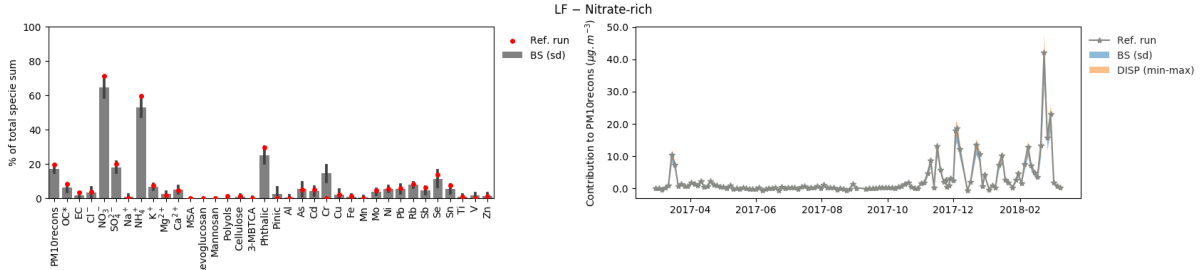

224

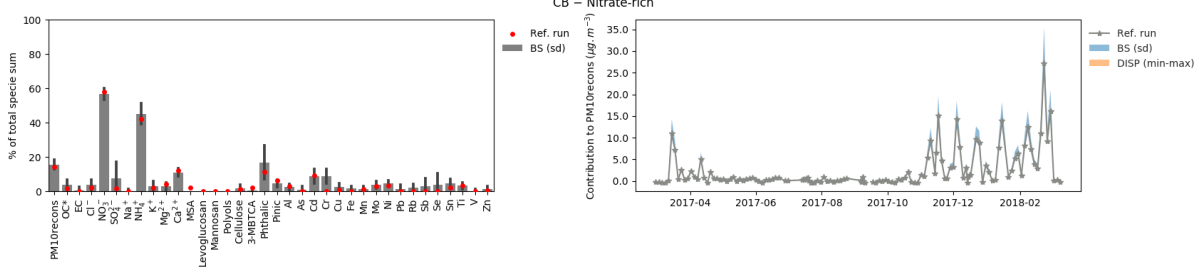

225

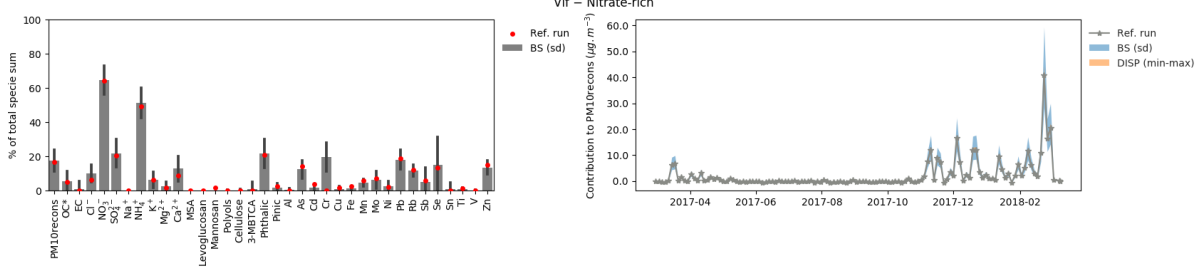

226

227

228

229

Figure S3.5. Chemical profile and temporal evolution with error estimates of the nitrate-rich factor in LF (top), CB (middle), and Vif (bottom).

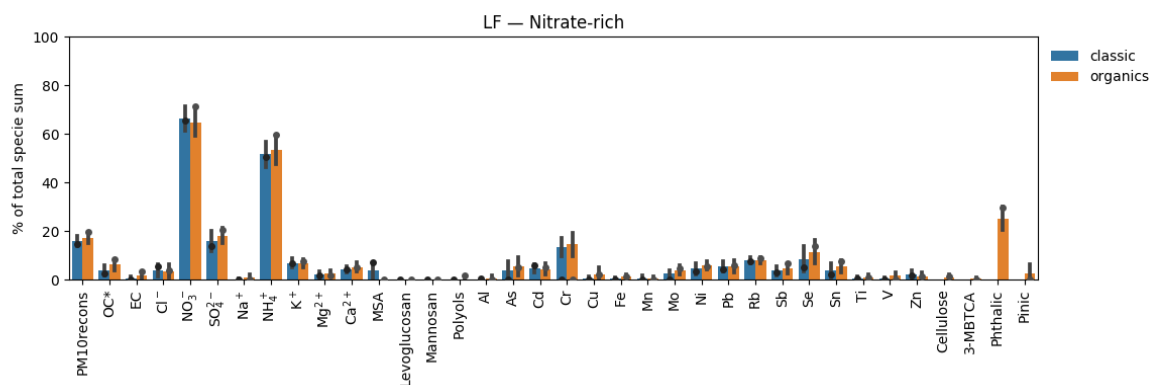

230

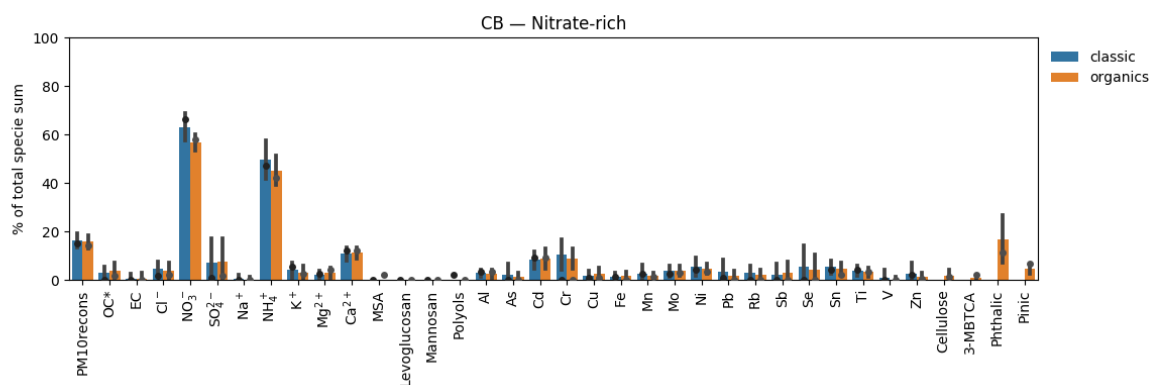

231

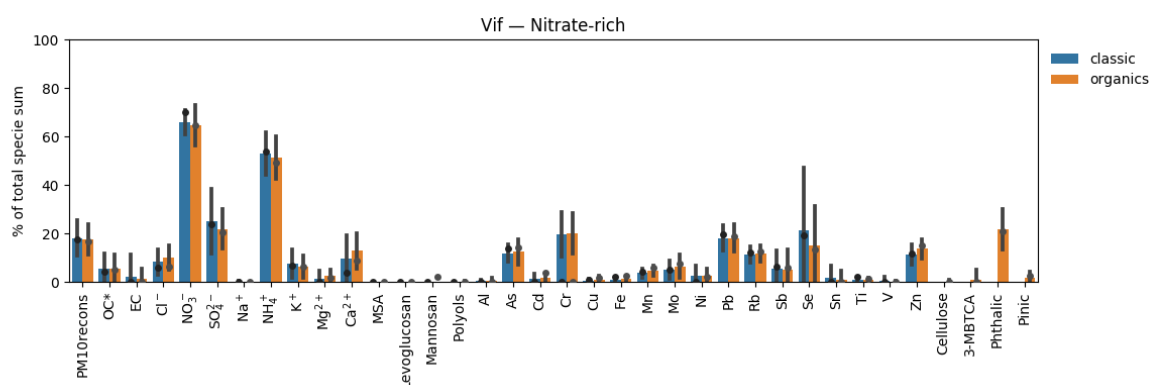

232

233 **Figure S3.5.1 Comparison of chemical profile between the classic and orga PMF run for the nitrate-rich factor in LF**  
 234 **(top), CB (middle), and Vif (bottom).**

235

236 The nitrate-rich factor, a secondary aerosol source derived from the presence of  $\text{NO}_3\text{NH}_4$  in the  
 237 atmosphere, was identified with high loadings of  $\text{NO}_3^-$  and  $\text{NH}_4^+$ . The mass concentrations of  
 238 these tracers have showed strong correlations across sites possibly indicating similar  
 239 atmospheric process affecting the contributions of the nitrate-rich source of  $\text{PM}_{10}$  in the  
 240 Grenoble basin. On an annual scale, nitrate-rich sources accounted for 14-19% of  $\text{PM}_{10}$  in all  
 241 sites.

242 This factor showed strong seasonality with highest contributions during winter season which  
 243 can be attributed to increased possibility of atmospheric inversions due to typical atmospheric  
 244 dynamics during this season in the area. Additionally, this temporal behaviour can be due to  
 245 higher instability of  $\text{NO}_3^-$  and  $\text{NH}_4^+$  during warm seasons (Mariani and De Mello, 2007). These  
 246 tracers are also commonly associated to secondary formation processes and long range transport  
 247 of aged air masses especially during high  $\text{PM}_{10}$  concentration levels (Tomaz et al. 2017). The  
 248 presence of phthalic acid in the nitrate-rich factor also suggests influence from SOA formation

249 (Al-Neima and Stone, 2017; Kleindienst et al, 2012). In fact, a high pollution event (PM<sub>10</sub>  
250 ranging from 44.80-50.0 µg m<sup>-3</sup>) affecting all the sites was noted during winter (February 23,  
251 2018) where the concentrations of specific species including NO<sub>3</sub><sup>-</sup>, SO<sub>4</sub><sup>2-</sup>, NH<sub>4</sub><sup>+</sup>, and phthalic  
252 acid were elevated in all sites. During this day, the nitrate-rich factor accounted for 83% (in  
253 LF), 50% (in CB), and 60% (in Vif) of the total PM<sub>10</sub> confirming heavy influence of secondary  
254 formation processes possibly due to long range transport of pollutants.

255 **Sulfate-rich**

256

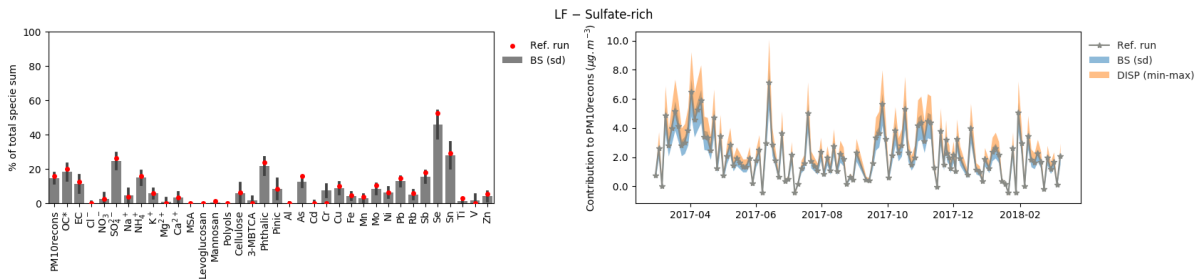

257

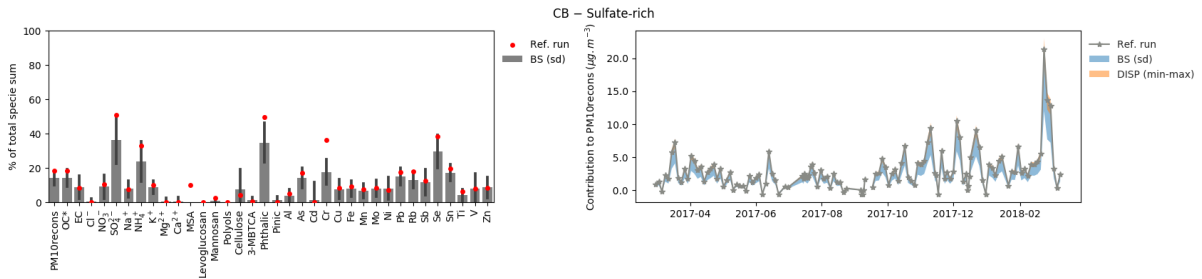

258

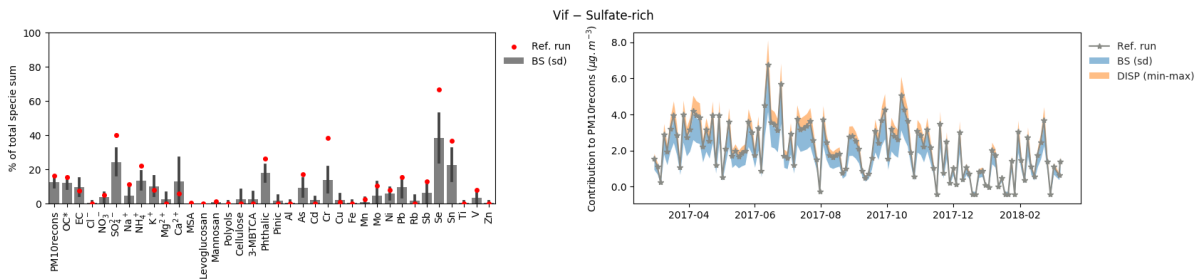

259

260

261

262

**Figure S3.6. Chemical profile and temporal evolution with error estimates of the sulfate-rich factor in LF (top), CB (middle), and Vif (bottom).**

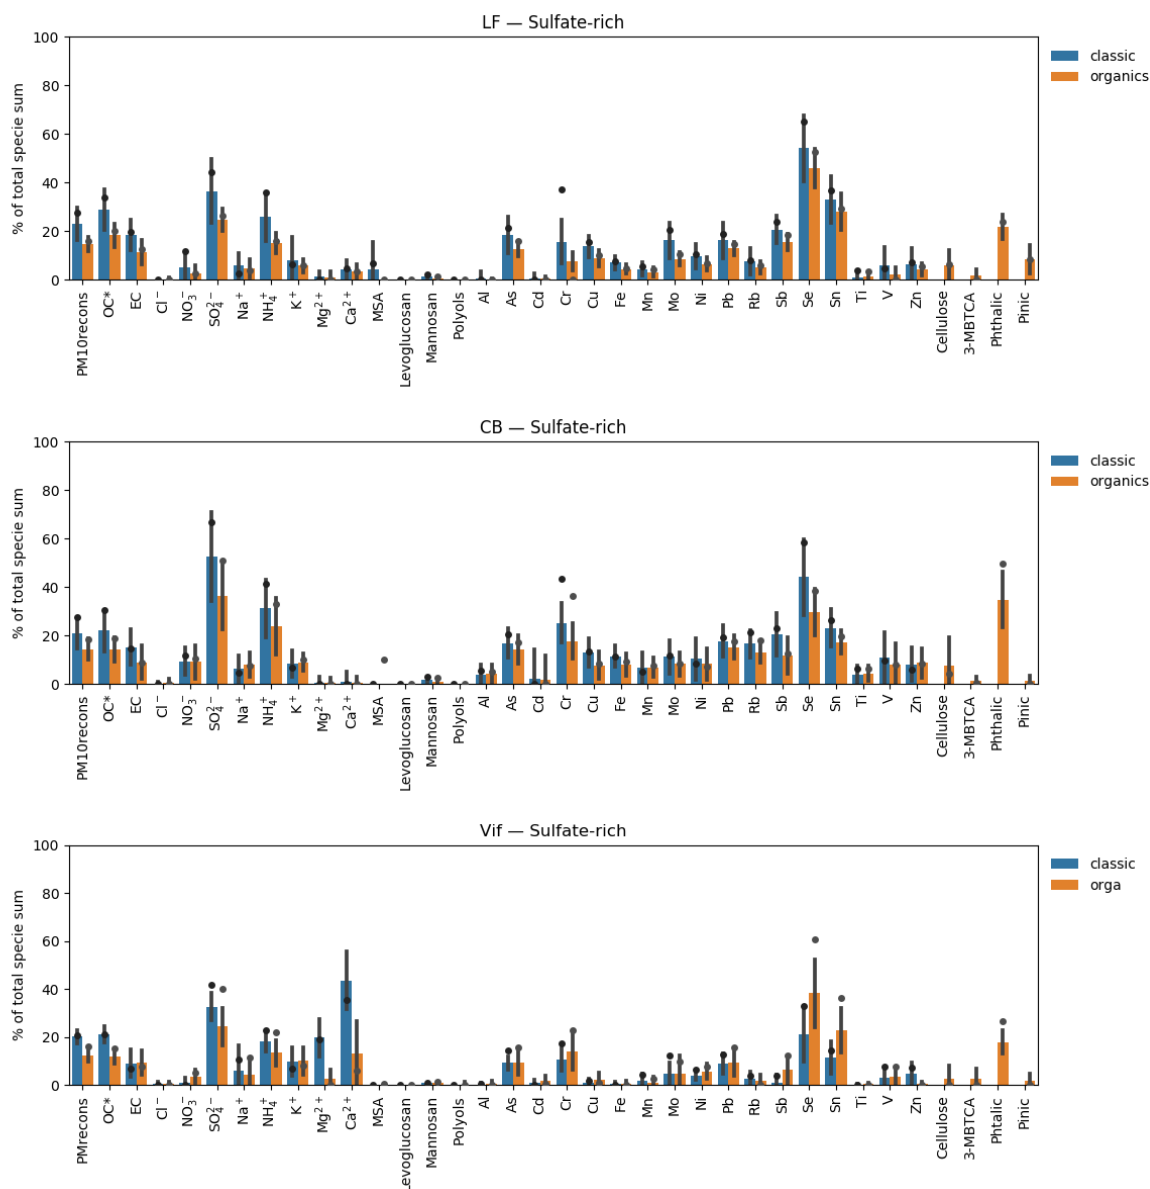

263

264

265

266 **Figure S3.6.1 Comparison of chemical profile between the classic and orga PMF run for the sulfate-rich factor in LF**  
 267 **(top), CB (middle), and Vif (bottom).**

268

269 The sulfate-rich factor, a secondary aerosol source from  $\text{SO}_4(\text{NH}_4)_2$ , was identified with high  
 270 loadings of  $\text{SO}_4^{2-}$ ,  $\text{NH}_4^+$ , and Se. In Vif, this factor also had minimal loadings of metal species  
 271 including Cr and Sn. On an annual scale, sulfate-rich factor accounted for 16-18% of  $\text{PM}_{10}$   
 272 across the urban sites in Grenoble.

273 This factor remained relatively steady due to the influence from long-range transport but did  
 274 not show seasonality that was previously found in the nitrate-rich factor. Most of the tracers,  
 275  $\text{SO}_4^{2-}$ ,  $\text{NH}_4^+$ , and phthalic acid, in this factor have showed strong correlations across sites,  
 276 except for Se. The presence of Se in this factor may suggest a contribution from gasoline and  
 277 diesel emissions (De Santiago et al., 2014) which can be highly localized in nature affecting the  
 278 over-all temporal correlation of the sulfate-rich source across sites. The presence of phthalic  
 279 acid in this factor also suggests influence from SOA formation as reported in other studies (Al-  
 280 Neima and Stone, 2017; Kleindienst et al., 2012).

281 **Primary biogenic**

282

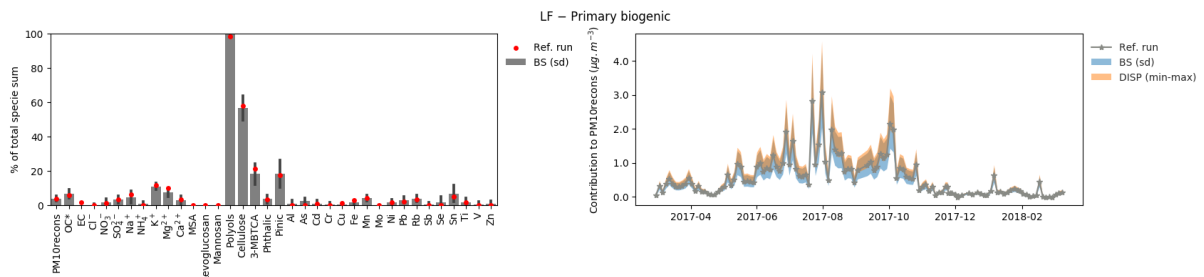

283

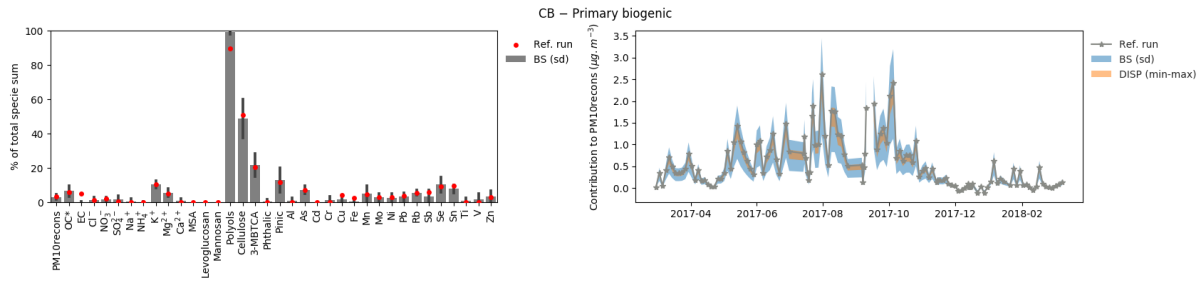

284

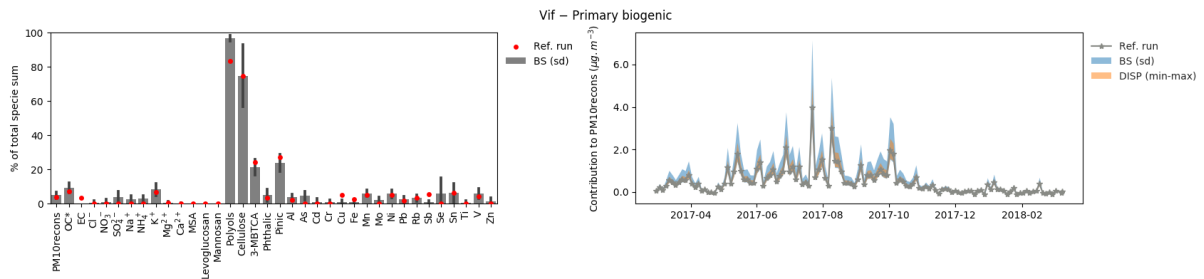

285

286

287

288

**Figure S3.7. Chemical profile and temporal evolution with error estimates of the primary biogenic factor in LF (top), CB (middle), and Vif (bottom).**

289

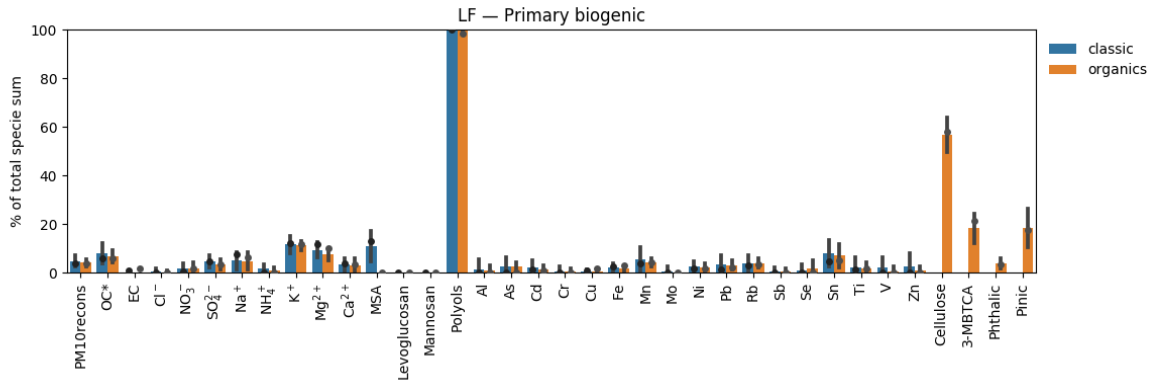

290

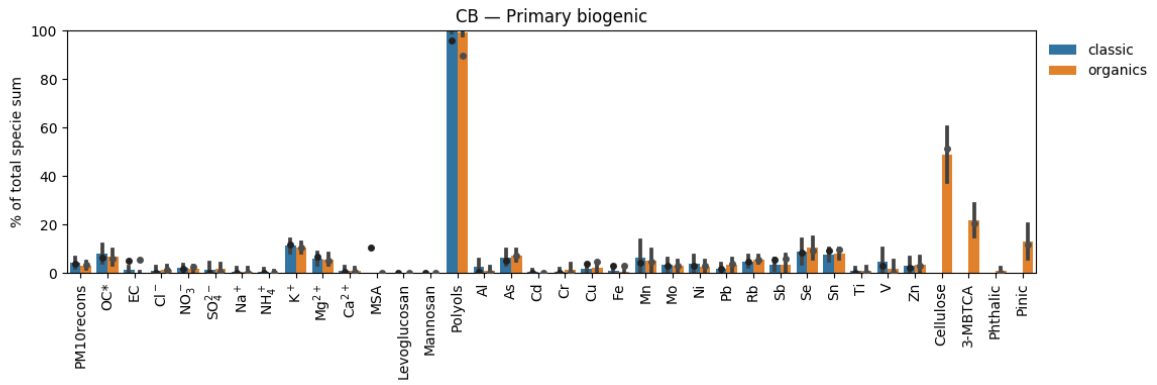

291

292

293

294

Figure S3.7.1 Comparison of chemical profile between the classic and organics PMF run for the primary biogenic factor in LF (top), CB (middle), and Vif (bottom).

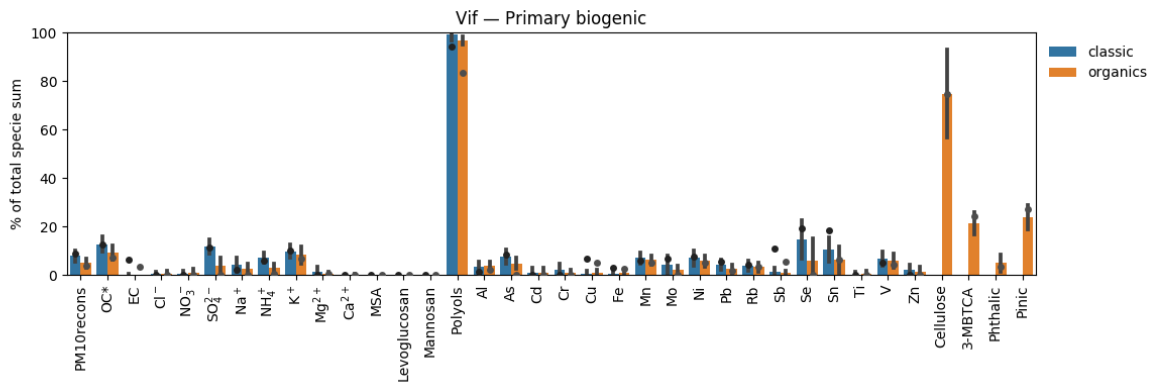

295 **MSA-rich**

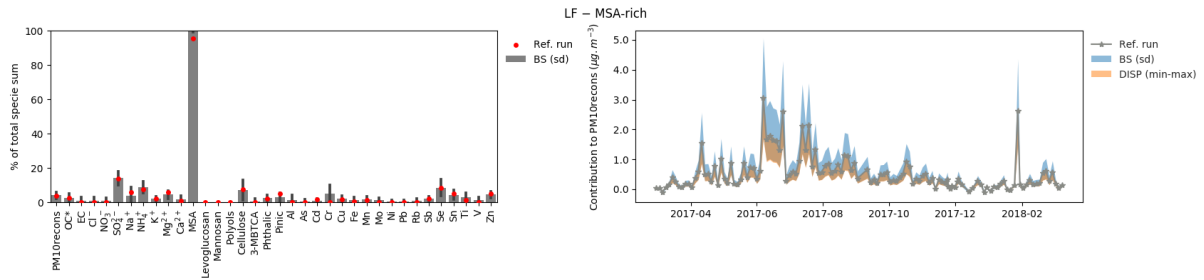

296

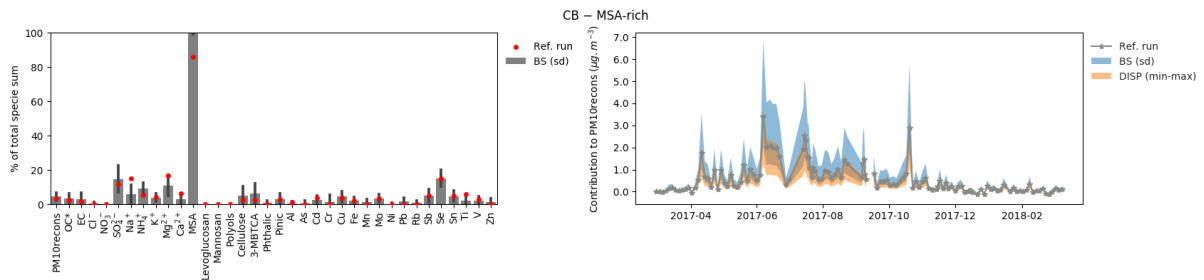

297

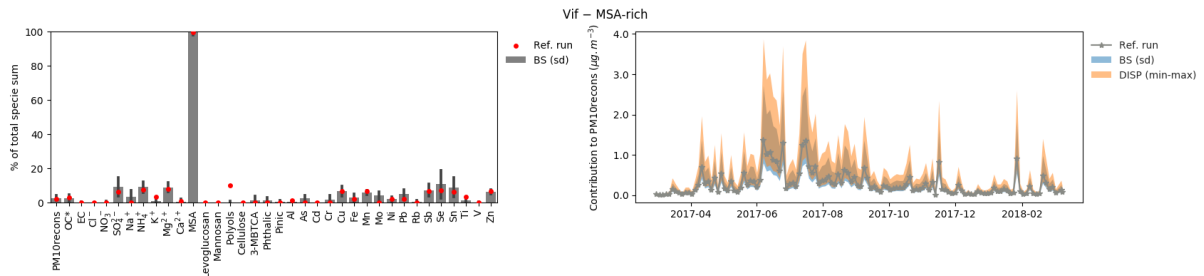

298  
299  
300  
301

**Figure S3.8. Chemical profile and temporal evolution with error estimates of the MSA-rich factor in LF (top), CB (middle), and Vif (bottom).**



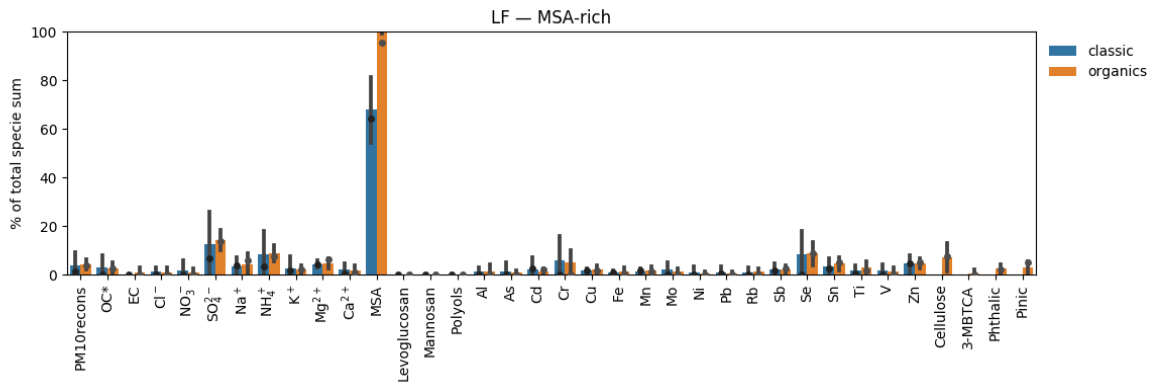

302

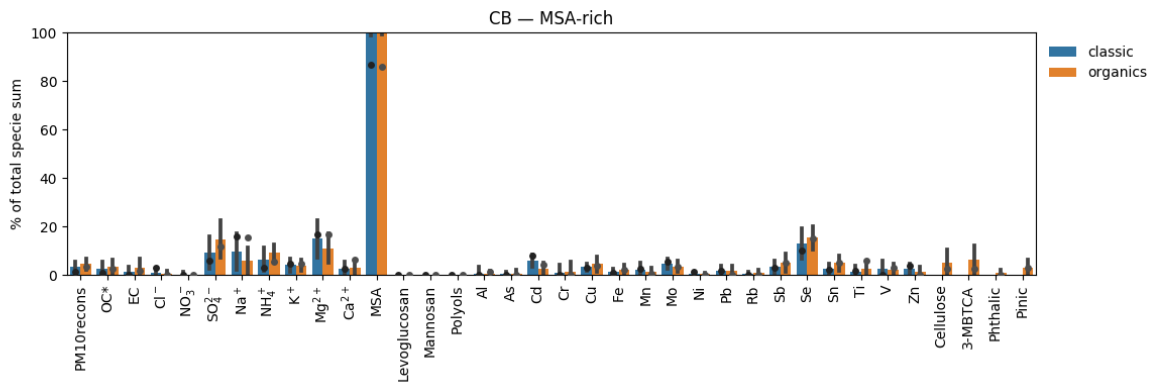

303

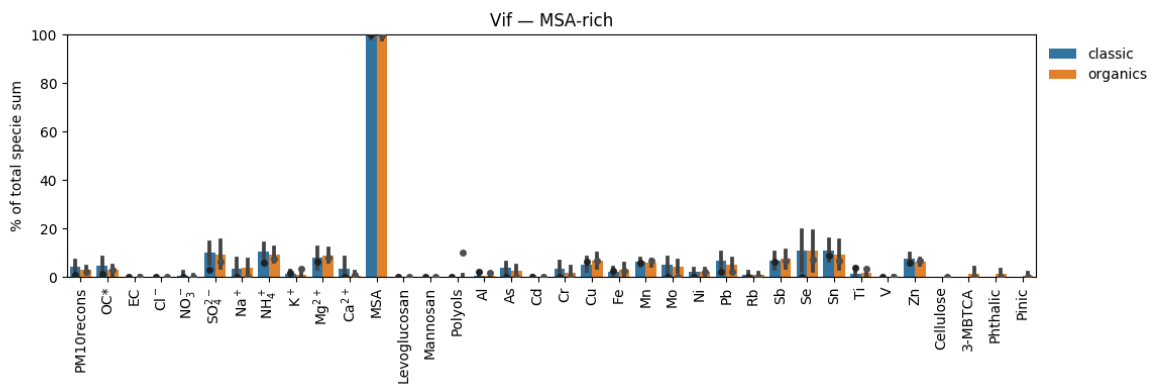

304

305

306

307

Figure S3.8.1 Comparison of chemical profile between the classic and orga PMF run for the MSA-rich factor in LF (top), CB (middle), and Vif (bottom).

308 **Secondary biogenic oxidation**

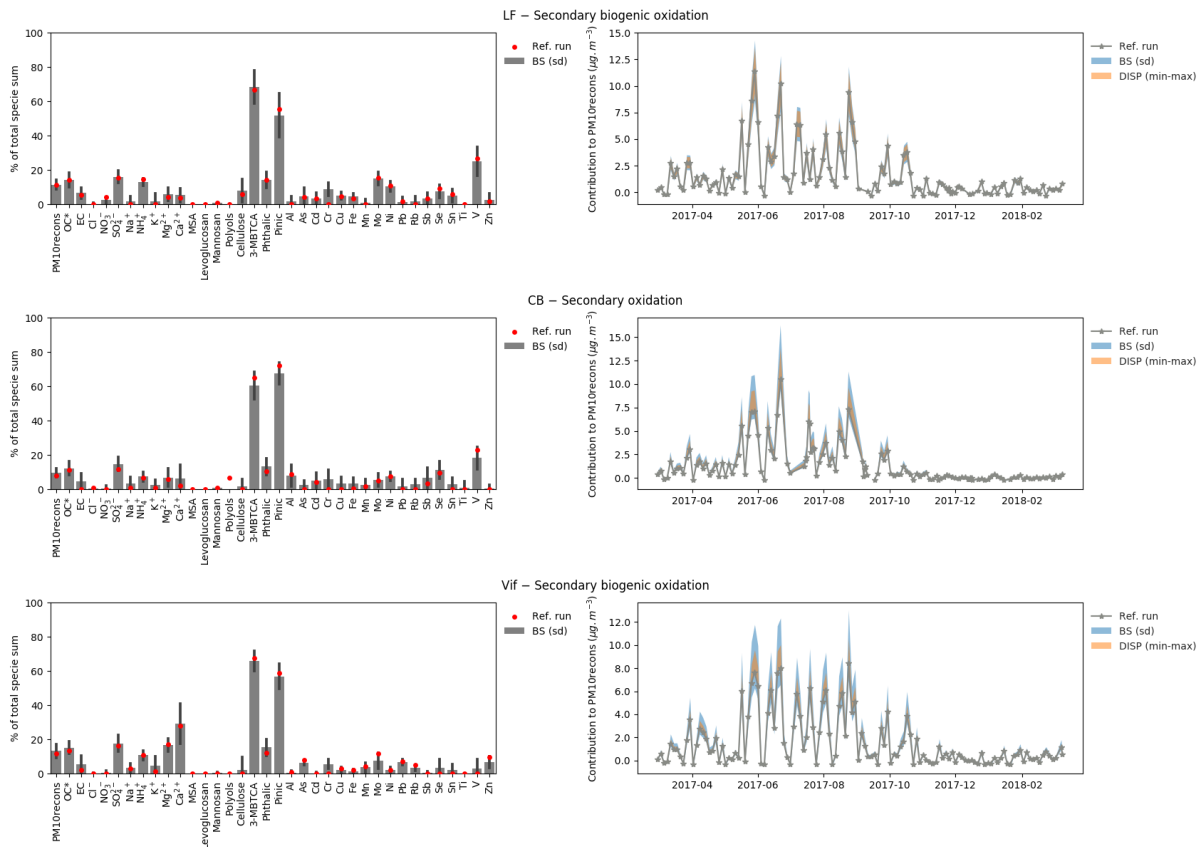

311 **Figure S3.9. Chemical profile and temporal evolution with error estimates of the secondary biogenic oxidation factor in**  
 312 **LF (top), CB (middle), and Vif (bottom). Note: This factor was not identified in the classic PMF run.**  
 313

314 **Industrial**

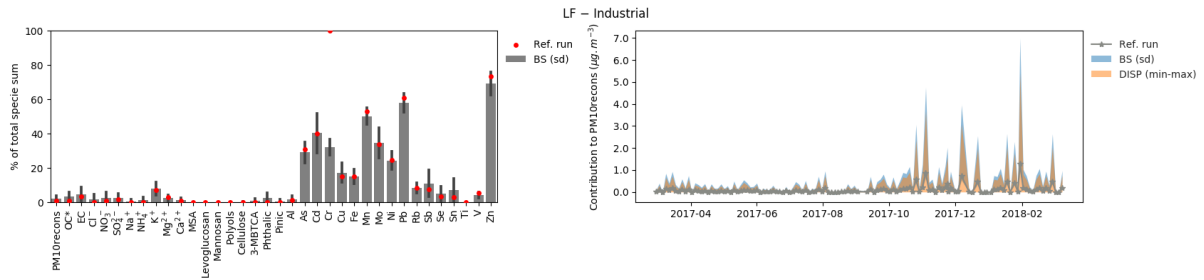

315

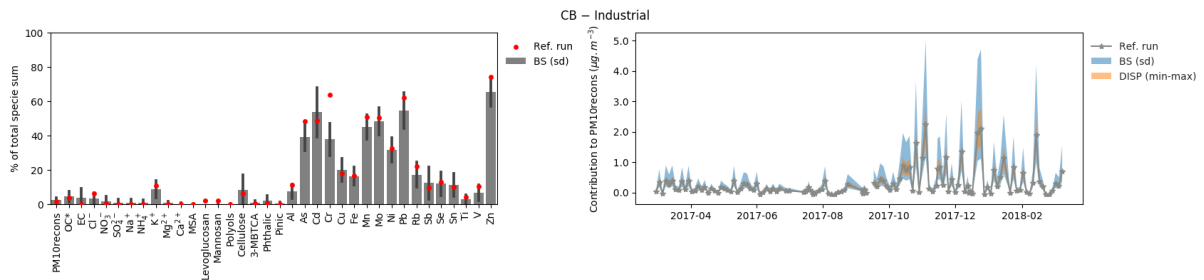

316

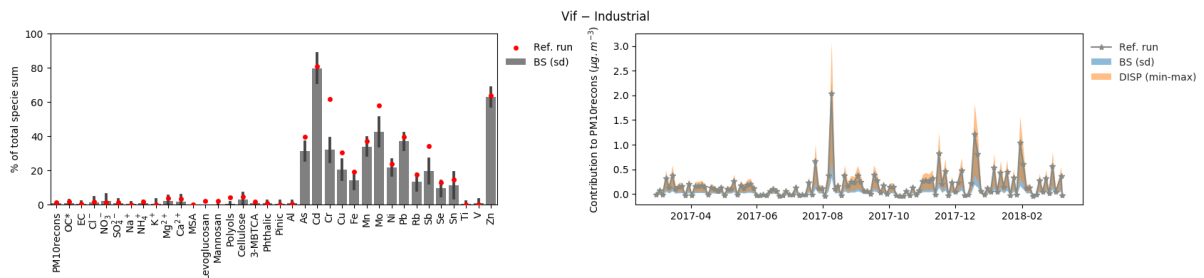

317  
318  
319  
320

**Figure S3.10. Chemical profile and temporal evolution with error estimates of the industrial factor in LF (top), CB (middle), and Vif (bottom)**

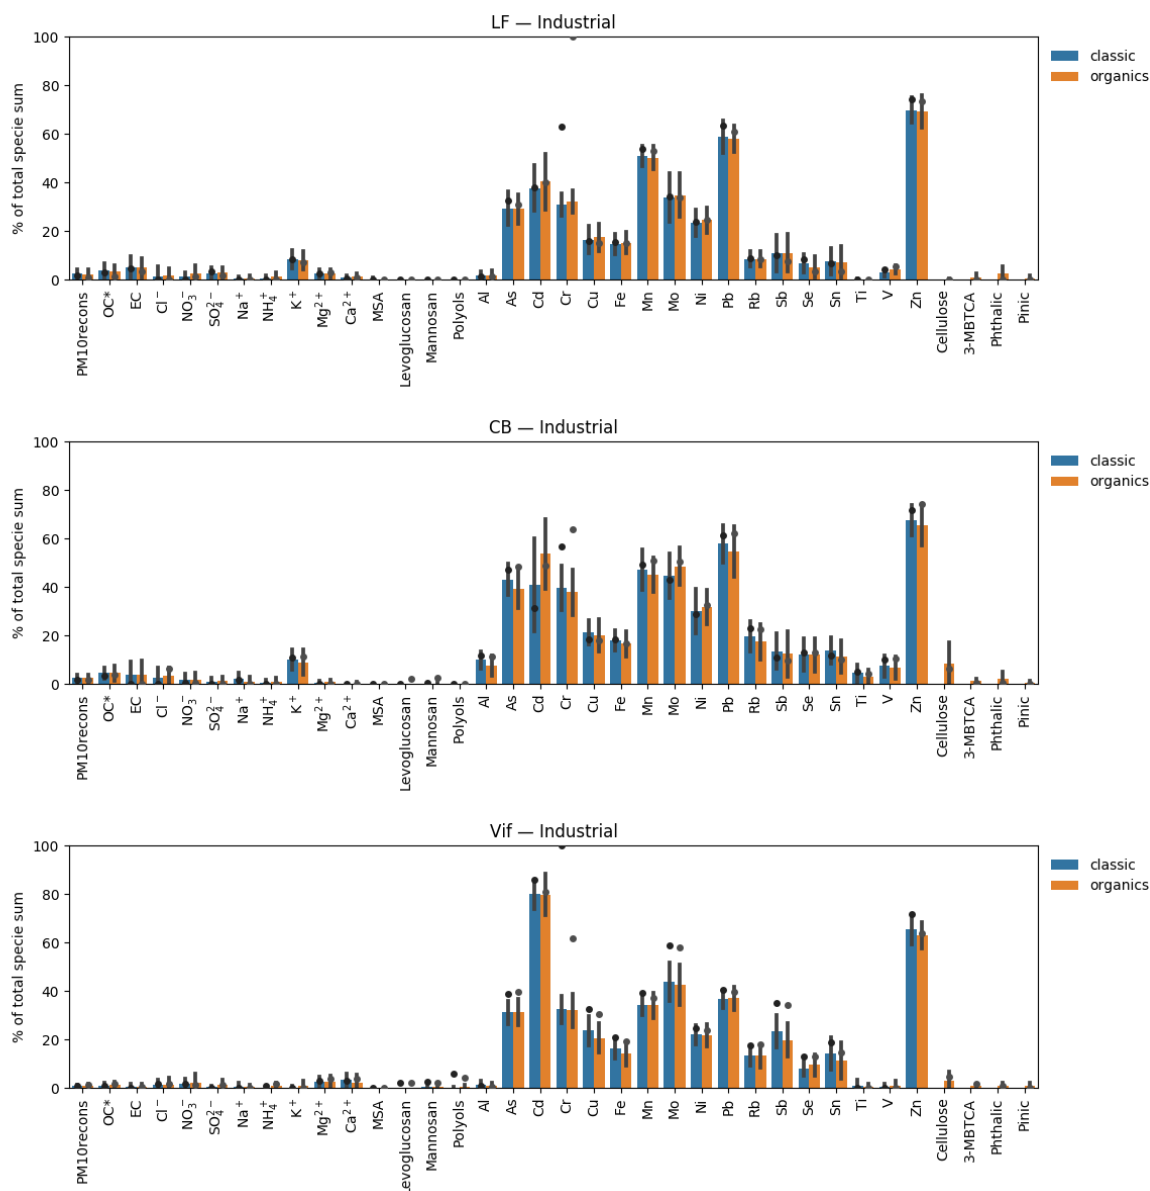

321

322

323

324 **Figure S3.10.1 Comparison of chemical profile between the classic and orga PMF run for the industrial factor in LF**  
 325 **(top), CB (middle), and Vif (bottom).**

326

327

328 The industrial factor was identified with high loadings of trace elements including As, Cd, Cr,  
 329 Mn, Mo, Ni, Pb, and Zn. On an annual scale, this factor only accounted for 1-2% of the total  
 330 mass of PM. It is interesting to note that LF and CB showed comparable chemical profiles  
 331 suggesting possible similarity in origin of this factor resulting to mild correlations between  
 332 these two sites. However, only weak correlations were seen in the industrial factor when  
 333 compared to Vif. In fact, Vif showed much higher contribution of Cd compared to other metals  
 334 in this factor. Nevertheless, this further highlights the robustness of the PMF model in  
 335 discriminating the chemical profiles of PM<sub>10</sub> sources in spite of diversity at a fine-scale  
 336 resolution.

337 One of the possible sources of Cd and Ni in the city of Grenoble are modern municipal waste  
 338 incinerators (Boudet et al., 1999). The elevated contributions of Cd in Vif may also be due to  
 339 additional influence from a nearby chemical industrial area (<6 km of the sampling location) in  
 340 the southeast of Grenoble.

341 **Mineral dust**

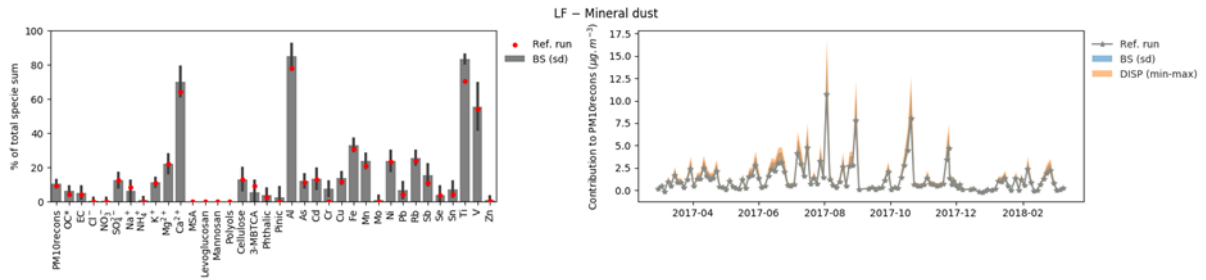

342

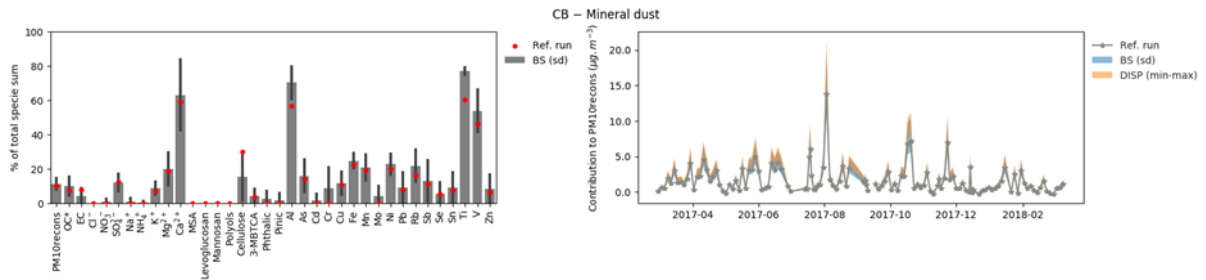

343

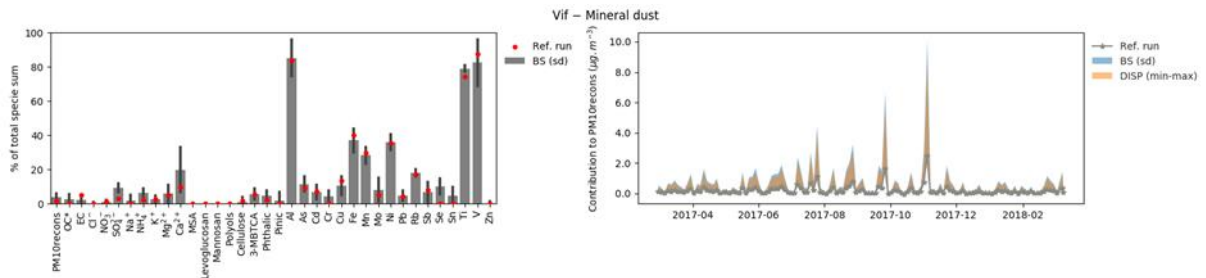

344  
345  
346  
347

**Figure S3.11. Chemical profile and temporal evolution with error estimates of the mineral dust factor in LF (top), CB (middle), and Vif (bottom).**

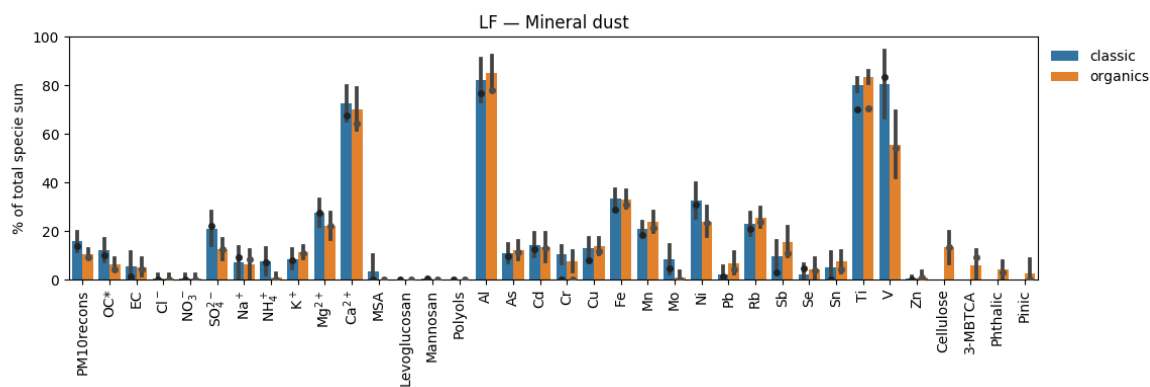

348

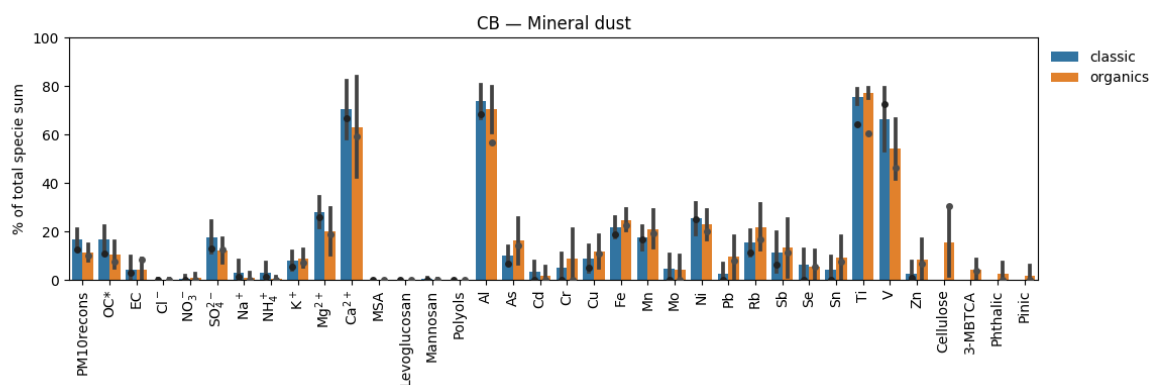

349

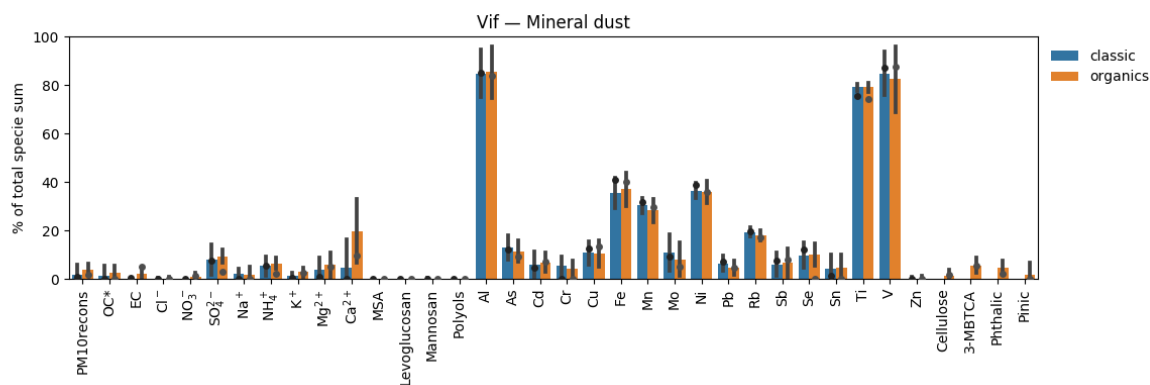

350

351 **Figure S3.11.1 Comparison of chemical profile between the classic and orga PMF run for the mineral dust factor in LF**  
 352 **(top), CB (middle), and Vif (bottom).**

353

354 The mineral dust factor was identified with high loadings of  $\text{Ca}^{2+}$ , Al, Ti, and V. In Vif, this  
 355 factor did not show as much loading of  $\text{Ca}^{2+}$  (see Fig. S3.11). The temporal evolution of  $\text{Ca}^{2+}$   
 356 showed strong correlations across all sites, however good correlations from Al, Ti, and V were  
 357 only found between LF and CB which has further resulted to strong correlations of the mineral  
 358 dust factor in these two sites. This highlights the capability of PMF to analyse and differentiate  
 359 the chemical profiles of sources even at high proximity of receptor locations. The loadings from  
 360 metal tracers suggests natural dust, and fossil fuel or industrial origins of this factor, especially  
 361 in Vif (Luo et al., 2008; Pan et al., 2015).

362 The presence of Fe, a good indicator of road traffic emissions, also suggests possible influence  
 363 from road dust resuspension in the mineral dust factor. On an annual scale, mineral dust sources  
 364 accounted for 9%, 10%, and 2% in LF, CB, and Vif, respectively.

365

#### 366 **S4. Comparison between the PMF results from Srivastava et al. (2018b) and our study**

367 One of the sites in our study, LF (urban background site), has been previously reported using a  
 368 one-year dataset collected in year 2013 (Srivastava et al., 2018b). The comparison of PMF  
 369 results obtained including the sources and its corresponding tracers and percentage contribution  
 370 are summarized in Table S4.

371 However, there are some differences in the input variables used resulting to differences in the  
 372 identified sources. The sources that are common to both studies are biomass burning, primary  
 373 traffic, mineral dust, and aged sea salt. The nitrate-rich and sulfate-rich sources were obtained  
 374 separately in our study while it was combined into one factor as the secondary inorganics in  
 375 Srivastava et al. (2018b). Although the tracers are available, sea/road salt and industrial sources  
 376 were not identified in Srivastava et al. (2018b). Due to the specific organic tracers used in our  
 377 study, we have also additionally obtained primary biogenic, MSA-rich, and secondary biogenic  
 378 oxidation sources.

379 It should be noted that Srivastava et al. (2018b) have identified a fungal spores source identified  
 380 by high loadings of polyols, which is one of the tracers that was similarly used to identify the  
 381 primary biogenic source in our study. This is only a question of naming the profile, fungal  
 382 spores emissions being one type of primary biogenic emissions. On the other hand, the plant  
 383 debris factor (another type of primary biogenic emissions) from their study using alkane tracers  
 384 were considered to be accounted in the primary biogenic factor in our study through the  
 385 contributions of cellulose in this factor. Although different organic acids were used, Srivastava  
 386 et al. (2018b) was able to obtain a biogenic SOA source identified by contributions from  $\alpha$ -  
 387 methylglyceric acid ( $\alpha$ -MGA and 2-methylerythritol (2-MT), hydroxyglutaric acid (3-HGA),  
 388 while our study have obtained a secondary biogenic oxidation source identified by 3-MBTCA  
 389 and pinic acid. Both of these factors are identified as a secondary biogenic oxidation source and  
 390 are very close in terms of percentage contribution. Lastly, Srivastava et al. (2018b) was able to  
 391 obtain an anthropogenic SOA source that was not identified in our study but may be considered  
 392 to be mixed in multiple sources through the contributions of phthalic acid.

393 **Table S5. The comparison of PMF-resolved sources, tracers, and annual average percentage contribution between**  
 394 **Srivastava et al. (2018b) and our study.**

| Sources         | Our study (LF only)                                               |                             |                                            | Srivastava et al. (2018b)                    |                             |
|-----------------|-------------------------------------------------------------------|-----------------------------|--------------------------------------------|----------------------------------------------|-----------------------------|
|                 | Tracers                                                           | Percentage contribution (%) | Average $\pm$ std ( $\mu\text{g m}^{-3}$ ) | Tracers                                      | Percentage contribution (%) |
| Biomass burning | Levoglucosan, mannosan, K <sup>+</sup> , Rb, Cl <sup>-</sup>      | 17                          | 2.3 $\pm$ 3.2                              | Levoglucosan, coniferaldehyde, vanillic acid | 20                          |
| Primary traffic | EC, Ca <sup>2+</sup> , Cu, Fe, Sb, Sn                             | 12                          | 1.8 $\pm$ 2.4                              | EC, hopanes (H5 to H8)                       | 14                          |
| Nitrate-rich    | NO <sub>3</sub> <sup>-</sup> , NH <sub>4</sub> <sup>+</sup>       | 20                          | 2.8 $\pm$ 5.7                              | N/A                                          | N/A                         |
| Sulfate-rich    | SO <sub>4</sub> <sup>2-</sup> , NH <sub>4</sub> <sup>+</sup> , Se | 16                          | 2.2 $\pm$ 1.6                              | N/A                                          | N/A                         |
| Mineral dust    | Ca <sup>2+</sup> *, Al, Ti                                        | 9                           | 1.3 $\pm$ 1.6                              | Ca, Al, Ti                                   | 21                          |
| Sea/road salt   | Na <sup>+</sup> , Cl <sup>-</sup>                                 | 4                           | 0.5 $\pm$ 1.1                              | N/A                                          | N/A                         |
| Aged sea salt   | Na <sup>+</sup> , Mg <sup>2+</sup>                                | 3                           | 0.4 $\pm$ 0.4                              | Na <sup>+</sup> , Mg <sup>2+</sup>           | 2                           |

|                              |                                |     |         |                                                                                                               |     |
|------------------------------|--------------------------------|-----|---------|---------------------------------------------------------------------------------------------------------------|-----|
| Industrial                   | As, Cd, Cr, Mn, Mo, Ni, Pb, Zn | 1   | 0.1±0.2 | N/A                                                                                                           | N/A |
| Primary biogenic             | Polyols, cellulose             | 4   | 0.5±0.6 | N/A                                                                                                           | N/A |
| MSA-rich                     | MSA                            | 4   | 0.5±0.6 | N/A                                                                                                           | N/A |
| Secondary biogenic oxidation | 3-MBTCA, pinic acid            | 11  | 1.6±2.3 | N/A                                                                                                           | N/A |
| Fungal Spores                | N/A                            | N/A | N/A     | Polyols                                                                                                       | 5   |
| Secondary inorganics         | N/A                            | N/A | N/A     | NO <sub>3</sub> <sup>-</sup> , NH <sub>4</sub> <sup>+</sup> , SO <sub>4</sub> <sup>2-</sup> , Cl <sup>-</sup> | 13  |
| Plant debris                 | N/A                            | N/A | N/A     | alkanes ( C27 to C31)                                                                                         | 11  |
| Biogenic SOA                 | N/A                            | N/A | N/A     | α-methylglyceric acid (α-MGA and 2-methylerythritol (2-MT), hydroxyglutaric acid (3-HGA)                      | 12  |
| Anthropogenic SOA            | N/A                            | N/A | N/A     | acenaphthenequinone, 6H-dibenzo[b,d]pyran-6-one, 1,8-naphthalic anhydride, DHOPA                              | 2   |

395 Note: N/A: not available



396 **S5. Scatterplot of factor contributions site vs site**

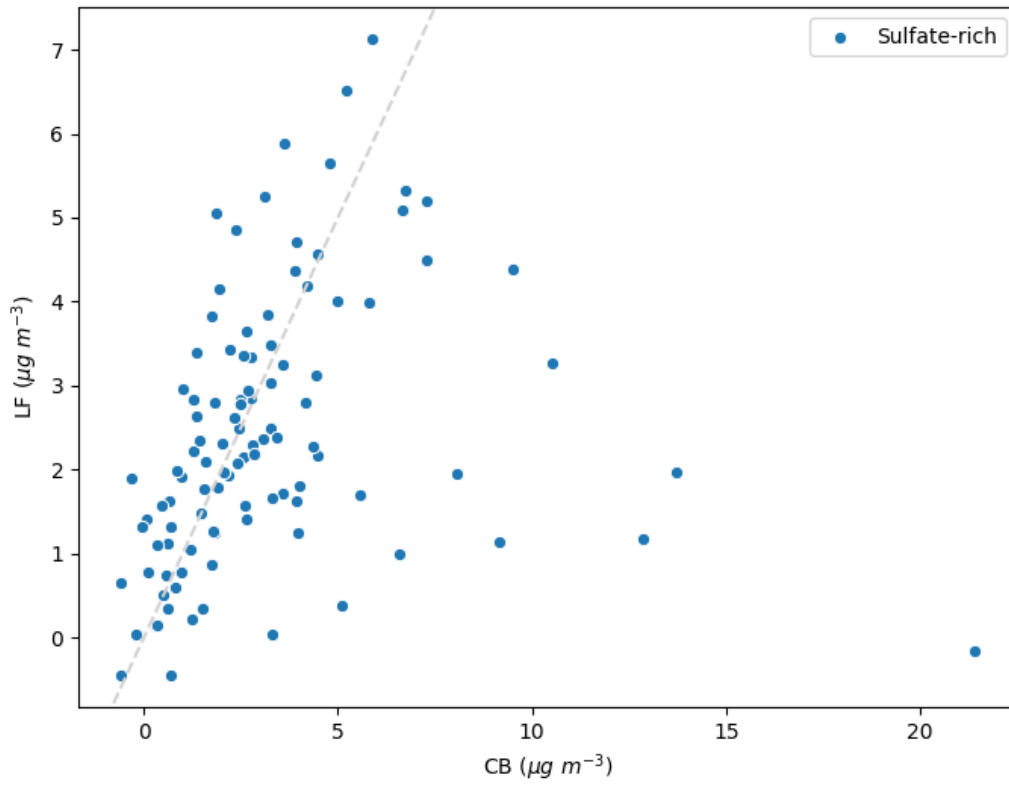

397

398 **Figure S5.1. Scatterplot of the sulfate-rich factor contribution between CB and LF. The dotted line is the x=y line.**

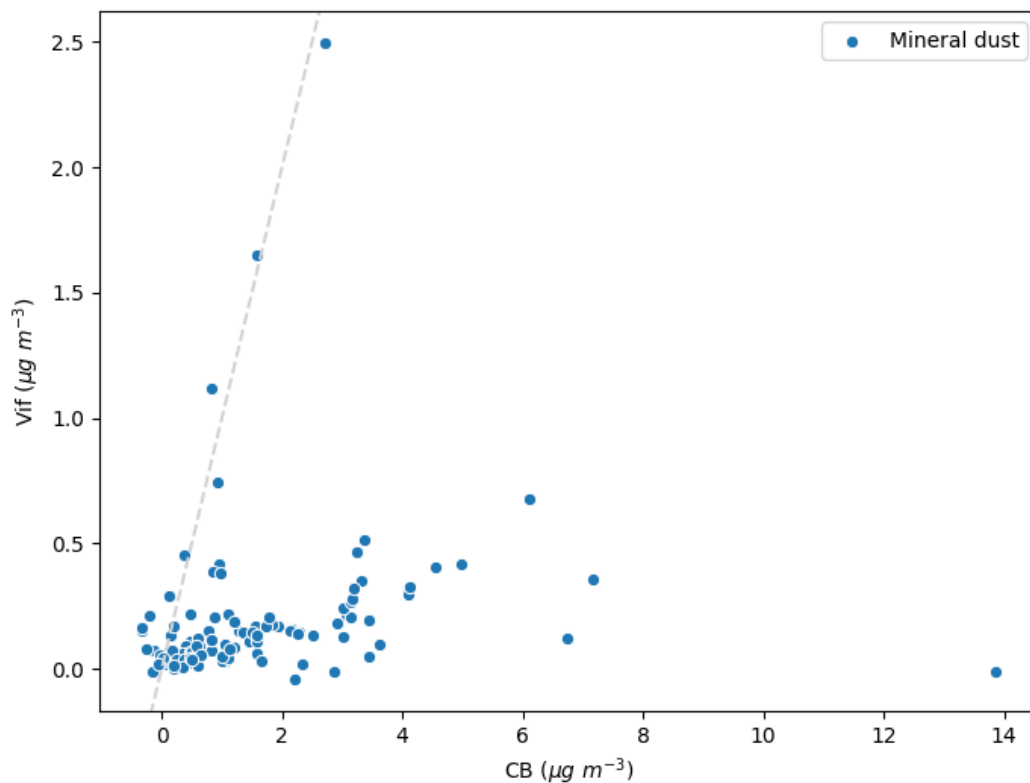

399  
400 Figure S5.2. Scatterplot of the mineral dust factor contribution between CB and Vif. The dotted line is the  $x=y$  line.

401

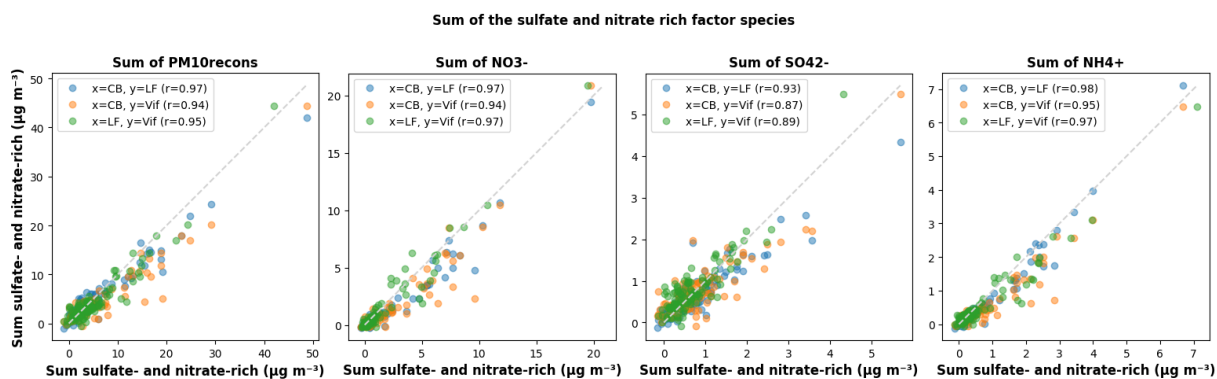

402  
403 Figure S5.3. Scatterplot comparison of total mass concentration of PM and major ions ( $\text{SO}_4^{2-}$ ,  $\text{NO}_3^-$ , and  $\text{NH}_4^+$ ) between  
404 sites when the sulfate- and nitrate-rich factors were combined

405

406 **S6. Comparison of chemical profiles from this study and from the 15 French sites**  
407 **(SOURCES)**

408

409

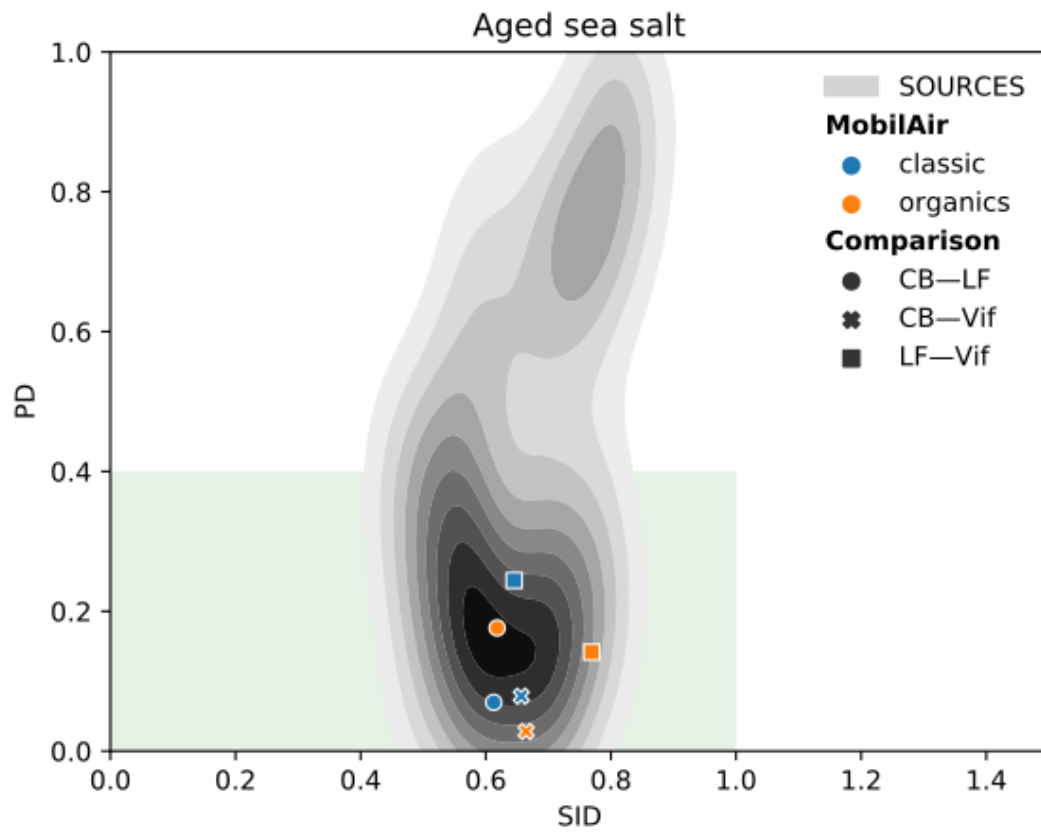

410

411 **Figure S6.1: Similarity plots for the aged sea salt factor for the pairs of sites formed in this study (Mobil’Air) compared**  
412 **to the probability density function of similarities obtained for the 15 French sites of the SOURCES program.**

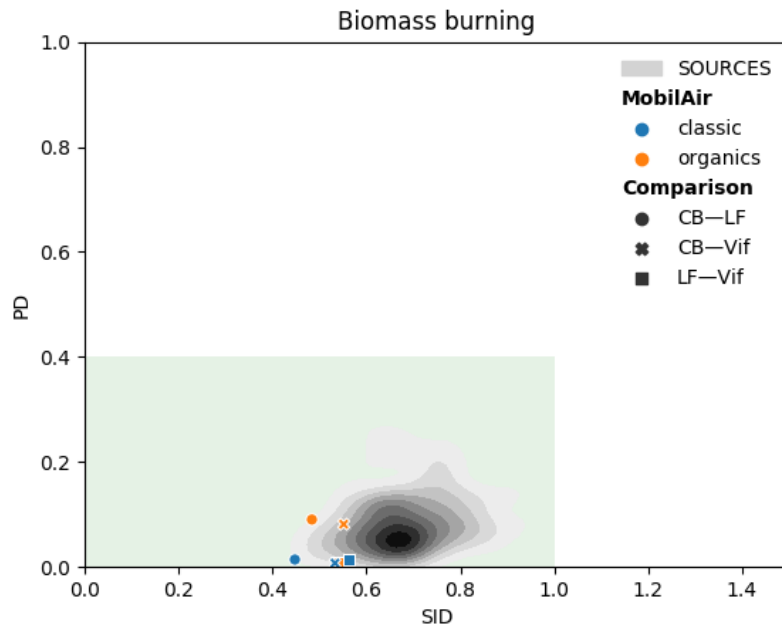

413

414 **Figure S6.2: Similarity plots for the biomass burning factor for the pairs of sites formed in this study (Mobil’Air)**  
 415 **compared to the probability density function of similarities obtained for the 15 French sites of the SOURCES program.**

416

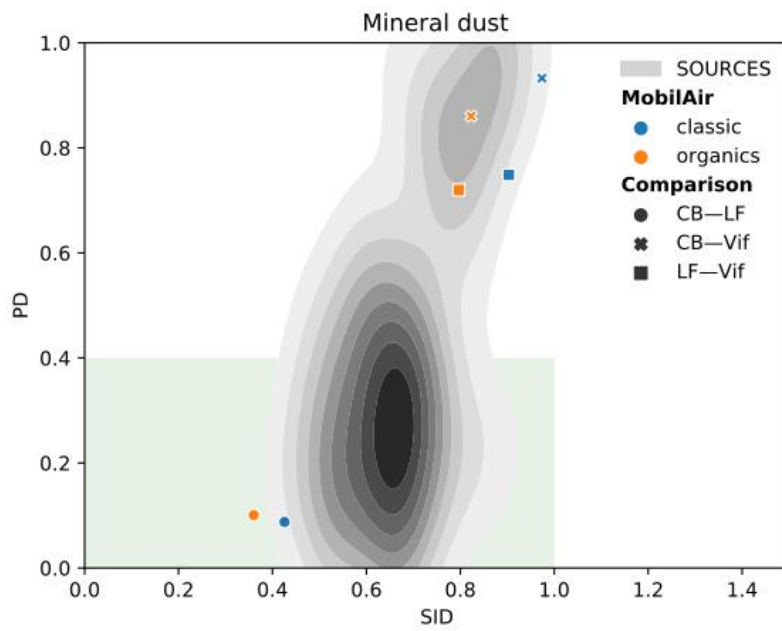

417

418 **Figure S6.3: Similarity plots for the mineral dust factor for the pairs of sites formed in this study (Mobil’Air)**  
 419 **compared to the probability density function of similarities obtained for the 15 French sites of the SOURCES program.**

420

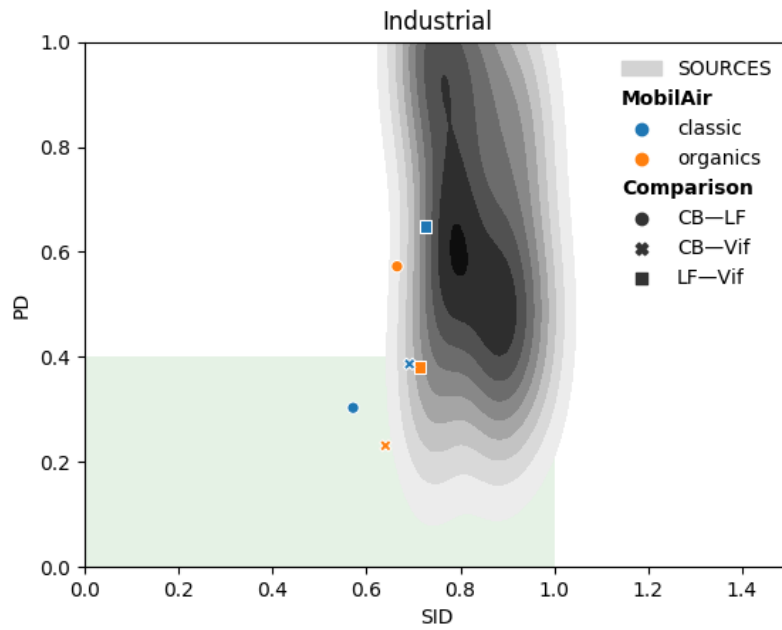

421

422 **Figure S6.4: Similarity plots for the industrial factor for the pairs of sites formed in this study (Mobil’Air) compared to**  
 423 **the probability density function of similarities obtained for the 15 French sites of the SOURCES program.**

424

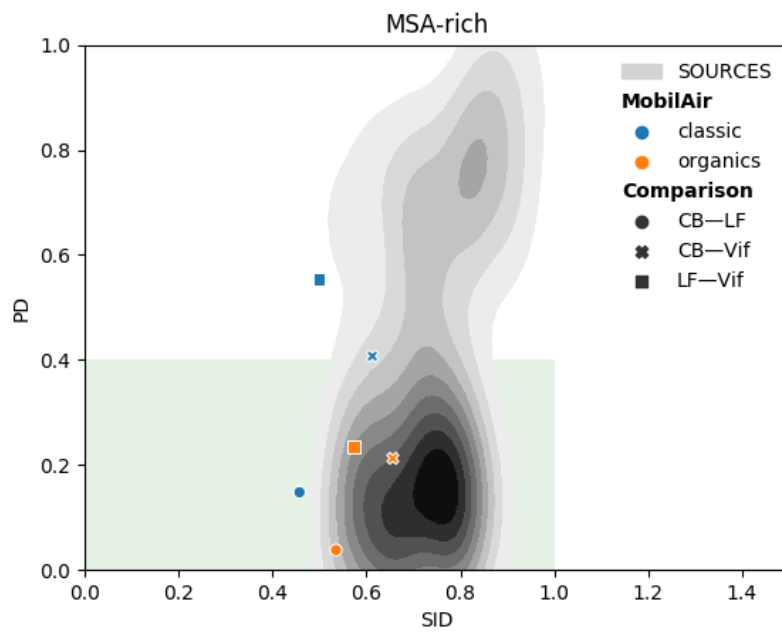

425

426 **Figure S6.5: Similarity plots for the MSA-rich factor for the pairs of sites formed in this study (Mobil’Air) compared**  
 427 **to the probability density function of similarities obtained for the 15 French sites of the SOURCES program.**

428

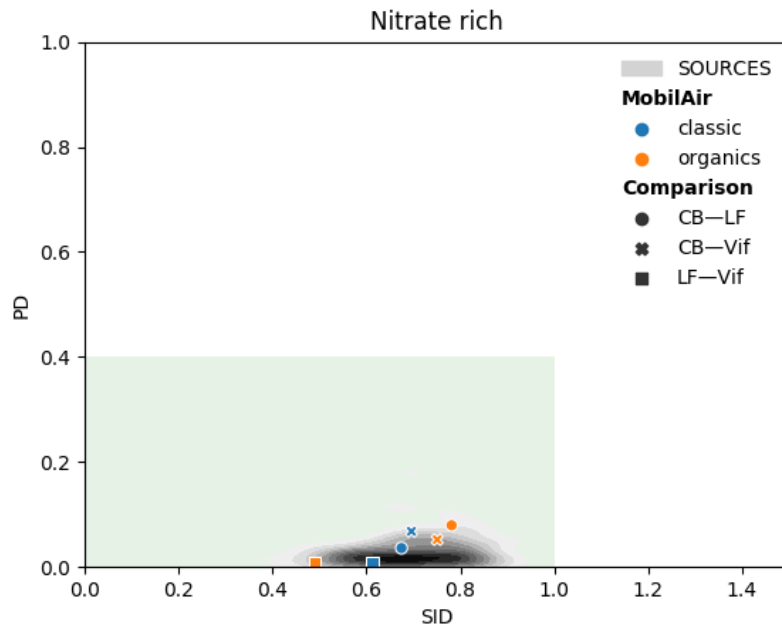

429

430 **Figure S6.6: Similarity plots for the nitrate-rich factor for the pairs of sites formed in this study (Mobil'Air) compared**  
 431 **to the probability density function of similarities obtained for the 15 French sites of the SOURCES program.**

432

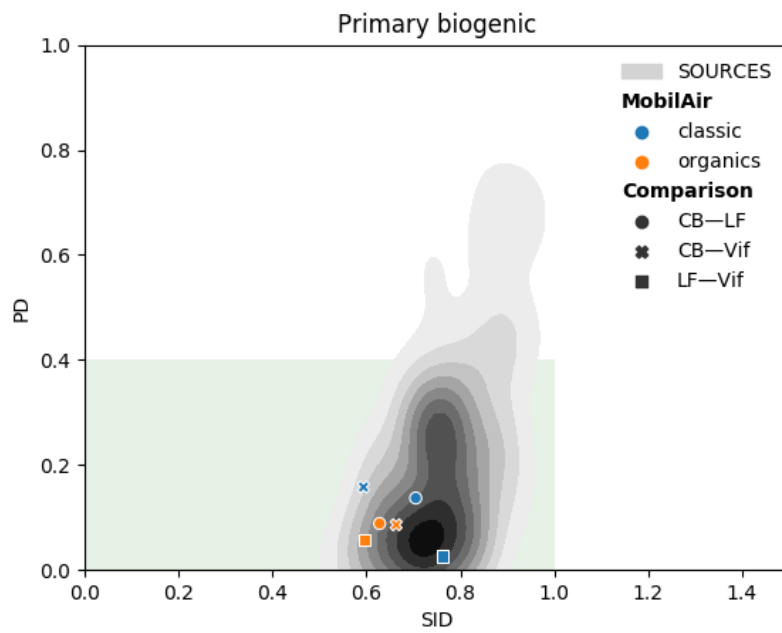

433

434 **Figure S6.7: Similarity plots for the primary biogenic factor for the pairs of sites formed in this study (Mobil'Air)**  
 435 **compared to the probability density function of similarities obtained for the 15 French sites of the SOURCES program.**
